# Supplementary material
Source: Preprints.org preprint supplement (doi:10.20944/preprints201905.0327.v2)
Supplement: Supplementary file 2 [file supplementary]

**Table S1:** Different 3D diffusion simulation conditions that were tested

| <b>Box<sup>1</sup> x<br/>(<math>\mu\text{m}</math>)</b> | <b>Box y<br/>(<math>\mu\text{m}</math>)</b> | <b>Box z<br/>(<math>\mu\text{m}</math>)</b> | <b>Box<br/>vol.<sup>2</sup><br/>(fL)</b> | <b>No. of<br/>molecules</b> | <b>Conc.<sup>3</sup><br/>(pM)</b> | <b>D<sup>4</sup><br/>(<math>\mu\text{m}^2/\text{s}</math>)</b> | <b>Time<sup>5</sup><br/>(s)</b> | <b>PSF<br/>model<sup>6</sup><br/>(G/N)</b> |
|---------------------------------------------------------|---------------------------------------------|---------------------------------------------|------------------------------------------|-----------------------------|-----------------------------------|----------------------------------------------------------------|---------------------------------|--------------------------------------------|
| 5.54                                                    | 5.54                                        | 13.85                                       | 425                                      | 15                          | 62                                | 90.0                                                           | 180                             | N                                          |
| 5.54                                                    | 5.54                                        | 13.85                                       | 425                                      | 15                          | 62                                | 90.0                                                           | 60                              | N                                          |
| 6.60                                                    | 6.60                                        | 19.70                                       | 858                                      | 15                          | 31                                | 90.0                                                           | 60                              | N                                          |
| 8.30                                                    | 8.30                                        | 24.90                                       | 1715                                     | 15                          | 15                                | 90.0                                                           | 60                              | N                                          |
| 5.54                                                    | 5.54                                        | 13.85                                       | 425                                      | 15                          | 62                                | 22.5                                                           | 60                              | N                                          |
| 5.54                                                    | 5.54                                        | 13.85                                       | 425                                      | 15                          | 62                                | 5.6                                                            | 180                             | N                                          |
| 5.54                                                    | 5.54                                        | 13.85                                       | 425                                      | 15                          | 62                                | 5.6                                                            | 60                              | N                                          |
| 5.54                                                    | 5.54                                        | 13.85                                       | 425                                      | 15                          | 62                                | 90.0                                                           | 180                             | G                                          |
| 5.54                                                    | 5.54                                        | 13.85                                       | 425                                      | 15                          | 62                                | 90.0                                                           | 60                              | G                                          |
| 6.60                                                    | 6.60                                        | 19.70                                       | 858                                      | 15                          | 31                                | 90.0                                                           | 60                              | G                                          |
| 8.30                                                    | 8.30                                        | 24.90                                       | 1715                                     | 15                          | 15                                | 90.0                                                           | 60                              | G                                          |
| 5.54                                                    | 5.54                                        | 13.85                                       | 425                                      | 15                          | 62                                | 22.5                                                           | 60                              | G                                          |
| 5.54                                                    | 5.54                                        | 13.85                                       | 425                                      | 15                          | 62                                | 5.6                                                            | 180                             | G                                          |
| 5.54                                                    | 5.54                                        | 13.85                                       | 425                                      | 15                          | 62                                | 5.6                                                            | 60                              | G                                          |

<sup>1</sup> The molecules diffuse inside a box having a length x, depth y & height z.

<sup>2</sup> The box volume is calculated from its dimensions

<sup>3</sup> The concentration is derived from the No. of molecules divided by Avogadro's number and then divided by

the volume (in L units)

<sup>4</sup> The diffusion coefficient.

<sup>5</sup> The overall simulation time.

<sup>6</sup> The model of the point-spread-function (PSF) used in the simulation, either using the Gaussian approximation (G), or a numerically calculated PSF (N). See details in Materials and Methods.

**Table S2:** the values of all quantities assessed in this work for all simulations of single detection channel SMFD (not single-molecule FRET)

| PSF <sup>1</sup><br>(G <sup>2</sup> /N <sup>3</sup> ) | C <sup>4</sup><br>(pM) | D <sup>5</sup><br>(μm <sup>2</sup> /s) | Sim<br>time <sup>6</sup><br>(s) | BG rate <sup>7</sup><br>(Hz) | m <sup>8</sup>    | F <sup>9</sup> | sz<br>th <sup>10</sup> | w sz <sup>11</sup><br>(ms) | %<br>photonic<br>impurity <sup>12</sup> | Fraction of<br>impure<br>bursts <sup>13</sup><br>(x10 <sup>-3</sup> ) | Mean burst<br>impurity <sup>14</sup><br>(x10 <sup>-3</sup> ) | Position<br>dispersion –<br>z <sup>15</sup><br>(nm) | Position<br>dispersion –<br>x <sup>16</sup><br>(nm) | Position<br>dispersion –<br>y <sup>17</sup><br>(nm) | FCS<br>diffusion<br>time <sup>18</sup><br>(ms) | FCS mean<br>molecules in<br>the PSF <sup>19</sup><br>(x10 <sup>-3</sup> ) | P(N>1) <sup>20</sup><br>(x10 <sup>-3</sup> ) | Mean burst width <sup>21</sup><br>(ms) |
|-------------------------------------------------------|------------------------|----------------------------------------|---------------------------------|------------------------------|-------------------|----------------|------------------------|----------------------------|-----------------------------------------|-----------------------------------------------------------------------|--------------------------------------------------------------|-----------------------------------------------------|-----------------------------------------------------|-----------------------------------------------------|------------------------------------------------|---------------------------------------------------------------------------|----------------------------------------------|----------------------------------------|
| G                                                     | 62                     | 90                                     | 180                             | 2433                         | 5                 | 6              | 5                      | 0.0                        | 2.2                                     | 67.9±5.3                                                              | 13.8±0.7                                                     | 555.1±0.9                                           | 118.8±0.2                                           | 118.3±0.2                                           | 2.8±1.9                                        | 17.1±1.2                                                                  | 8.5±0.6 <sup>22</sup>                        | 0.64±0.01                              |
|                                                       |                        |                                        |                                 |                              | 10                | 6              | 10                     | 0.0                        | 2.8                                     | 112.1±8.9                                                             | 20.2±1.1                                                     | 535.0±0.9                                           | 118.7±0.2                                           | 118.0±0.2                                           | 2.9±2.0                                        | 15.5±1.1                                                                  | 7.7±0.5                                      | 1.26±0.02                              |
|                                                       |                        |                                        |                                 |                              | 15                | 6              | 15                     | 0.0                        | 3.3                                     | 151.9±11.4                                                            | 25.3±1.3                                                     | 521.1±0.9                                           | 118.8±0.2                                           | 117.6±0.2                                           | 3.0±2.0                                        | 14.9±1.0                                                                  | 7.4±0.5                                      | 1.88±0.02                              |
|                                                       |                        |                                        |                                 |                              | 20                | 6              | 20                     | 0.0                        | 3.8                                     | 180.7±13.5                                                            | 30.1±1.6                                                     | 510.8±0.9                                           | 118.7±0.2                                           | 117.5±0.2                                           | 3.1±2.1                                        | 14.4±1.0                                                                  | 7.2±0.5                                      | 2.52±0.03                              |
|                                                       |                        |                                        |                                 |                              | 10                | 3              | 10                     | 0.0                        | 3.9                                     | 160.0±10.5                                                            | 29.2±1.3                                                     | 560.3±0.9                                           | 122.3±0.2                                           | 121.6±0.2                                           | 2.9±2.0                                        | 20.0±1.4                                                                  | 9.9±0.7                                      | 2.80±0.03                              |
|                                                       |                        |                                        |                                 |                              | 10                | 11             | 10                     | 0.0                        | 2.1                                     | 86.9±7.5                                                              | 15.6±0.9                                                     | 503.6±0.9                                           | 114.0±0.2                                           | 113.1±0.2                                           | 2.8±1.9                                        | 12.6±0.9                                                                  | 6.3±0.4                                      | 0.67±0.01                              |
|                                                       |                        |                                        |                                 |                              | 10                | 16             | 10                     | 0.0                        | 1.8                                     | 74.6±6.9                                                              | 13.4±0.8                                                     | 478.6±0.9                                           | 109.9±0.2                                           | 108.7±0.2                                           | 2.7±1.8                                        | 10.7±0.7                                                                  | 5.4±0.4                                      | 0.47±0.01                              |
|                                                       |                        |                                        |                                 |                              | 10                | 21             | 10                     | 0.0                        | 1.8                                     | 62.8±6.4                                                              | 11.6±0.8                                                     | 457.5±0.9                                           | 105.7±0.2                                           | 104.6±0.2                                           | 2.5±1.7                                        | 9.2±0.6                                                                   | 4.6±0.3                                      | 0.36±0.01                              |
|                                                       |                        |                                        |                                 |                              | 10                | 6              | 20                     | 0.0                        | 3.1                                     | 138.8±12.1                                                            | 23.7±1.5                                                     | 490.4±0.9                                           | 115.6±0.2                                           | 114.4±0.2                                           | 3.0±2.0                                        | 11.9±0.8                                                                  | 6.0±0.4                                      | 1.50±0.02                              |
|                                                       |                        |                                        |                                 |                              | 10                | 6              | 40                     | 0.0                        | 3.8                                     | 185.2±19.4                                                            | 32.6±2.5                                                     | 440.0±0.9                                           | 111.6±0.2                                           | 110.5±0.2                                           | 3.4±2.3                                        | 7.6±0.5                                                                   | 3.8±0.3                                      | 1.84±0.03                              |
|                                                       |                        |                                        |                                 |                              | 10                | 6              | 80                     | 0.0                        | 5.3                                     | 270.8±39.9                                                            | 50.0±5.2                                                     | 382.6±1.2                                           | 107.0±0.3                                           | 107.8±0.3                                           | 4.4±2.9                                        | 3.3±0.2                                                                   | 1.6±0.1                                      | 2.39±0.06                              |
|                                                       |                        |                                        |                                 |                              | 10                | 6              | 10                     | 0.5                        | 2.8                                     | 115.8±9.0                                                             | 20.9±1.1                                                     | 534.4±0.9                                           | 118.6±0.2                                           | 117.8±0.2                                           | 2.9±2.0                                        | 15.3±1.1                                                                  | 7.6±0.5                                      | 1.29±0.02                              |
|                                                       |                        |                                        |                                 |                              | 10                | 6              | 10                     | 1.0                        | 3.2                                     | 144.0±12.2                                                            | 25.0±1.5                                                     | 511.2±0.9                                           | 116.9±0.2                                           | 115.8±0.2                                           | 3.2±2.2                                        | 11.8±0.8                                                                  | 5.9±0.4                                      | 1.57±0.02                              |
|                                                       |                        |                                        |                                 |                              | All <sup>23</sup> |                |                        |                            |                                         |                                                                       |                                                              |                                                     |                                                     |                                                     | 2.5±1.9                                        | 150.9±11.9                                                                | 10.3±1.5 <sup>24</sup>                       |                                        |
| G                                                     | 62                     | 90                                     | 60                              | 2438                         | 5                 | 6              | 5                      | 0.0                        | 2.3                                     | 72.5±9.7                                                              | 14.1±1.2                                                     | 549.8±1.6                                           | 119.0±0.3                                           | 118.1±0.3                                           | 2.9±2.0                                        | 16.1±1.1                                                                  | 8.0±0.6                                      | 0.64±0.02                              |
|                                                       |                        |                                        |                                 |                              | 10                | 6              | 10                     | 0.0                        | 3.1                                     | 116.7±15.8                                                            | 21.1±2.0                                                     | 530.8±1.6                                           | 118.3±0.3                                           | 117.7±0.3                                           | 3.0±2.1                                        | 14.5±1.0                                                                  | 7.2±0.5                                      | 1.26±0.03                              |
|                                                       |                        |                                        |                                 |                              | 15                | 6              | 15                     | 0.0                        | 3.9                                     | 161.2±21.0                                                            | 27.0±2.5                                                     | 515.5±1.6                                           | 117.9±0.4                                           | 117.4±0.4                                           | 3.1±2.1                                        | 13.8±1.0                                                                  | 6.9±0.5                                      | 1.88±0.04                              |
|                                                       |                        |                                        |                                 |                              | 20                | 6              | 20                     | 0.0                        | 4.5                                     | 192.0±24.8                                                            | 32.5±3.0                                                     | 505.3±1.6                                           | 118.2±0.4                                           | 117.2±0.4                                           | 3.2±2.2                                        | 13.3±0.9                                                                  | 6.6±0.5                                      | 2.52±0.06                              |
|                                                       |                        |                                        |                                 |                              | 10                | 3              | 10                     | 0.0                        | 4.2                                     | 156.4±18.5                                                            | 27.7±2.2                                                     | 553.2±1.6                                           | 121.9±0.4                                           | 121.5±0.4                                           | 3.0±2.1                                        | 18.5±1.3                                                                  | 9.2±0.6                                      | 2.76±0.06                              |
|                                                       |                        |                                        |                                 |                              | 10                | 11             | 10                     | 0.0                        | 2.2                                     | 88.4±13.4                                                             | 15.2±1.6                                                     | 502.2±1.5                                           | 113.4±0.3                                           | 113.0±0.3                                           | 2.9±2.0                                        | 11.9±1.3                                                                  | 6.0±0.4                                      | 0.66±0.02                              |
|                                                       |                        |                                        |                                 |                              | 10                | 16             | 10                     | 0.0                        | 2.1                                     | 77.6±12.6                                                             | 14.1±1.5                                                     | 474.5±1.5                                           | 108.9±0.4                                           | 108.3±0.3                                           | 2.8±1.9                                        | 10.0±0.7                                                                  | 5.0±0.3                                      | 0.47±0.01                              |
|                                                       |                        |                                        |                                 |                              | 10                | 21             | 10                     | 0.0                        | 2                                       | 69.3±12.1                                                             | 13.0±1.5                                                     | 452.5±1.5                                           | 104.6±0.4                                           | 104.3±0.3                                           | 2.6±1.8                                        | 8.6±0.6                                                                   | 4.3±0.3                                      | 0.36±0.01                              |
|                                                       |                        |                                        |                                 |                              | 10                | 6              | 20                     | 0.0                        | 3.4                                     | 151.1±22.5                                                            | 25.7±2.7                                                     | 485.3±1.5                                           | 114.5±0.4                                           | 114.3±0.4                                           | 3.1±2.1                                        | 11.1±0.8                                                                  | 5.5±0.4                                      | 1.50±0.04                              |
|                                                       |                        |                                        |                                 |                              | 10                | 6              | 40                     | 0.0                        | 4.1                                     | 200.8±36.0                                                            | 33.2±4.3                                                     | 436.4±1.6                                           | 110.8±0.4                                           | 110.1±0.4                                           | 3.5±2.4                                        | 7.0±0.5                                                                   | 3.5±0.2                                      | 1.85±0.06                              |
|                                                       |                        |                                        |                                 |                              | 10                | 6              | 80                     | 0.0                        | 6                                       | 290.3±72.3                                                            | 56.1±9.8                                                     | 370.9±1.9                                           | 104.2±0.5                                           | 107.2±0.6                                           | 4.4±3.0                                        | 3.2±0.2                                                                   | 1.6±0.1                                      | 2.41±0.11                              |
|                                                       |                        |                                        |                                 |                              | 10                | 6              | 10                     | 0.5                        | 3.1                                     | 120.1±16.3                                                            | 21.8±2.0                                                     | 530.0±1.6                                           | 118.2±0.4                                           | 117.7±0.4                                           | 3.0±2.1                                        | 14.3±1.0                                                                  | 7.1±0.5                                      | 1.29±0.03                              |
|                                                       |                        |                                        |                                 |                              | 10                | 6              | 10                     | 1.0                        | 3.6                                     | 150.9±22.2                                                            | 27.2±2.8                                                     | 508.2±1.7                                           | 116.0±0.4                                           | 115.9±0.4                                           | 3.3±2.3                                        | 11.1±0.8                                                                  | 5.5±0.4                                      | 1.56±0.34                              |
|                                                       |                        |                                        |                                 |                              | All               |                |                        |                            |                                         |                                                                       |                                                              |                                                     |                                                     |                                                     | 2.6±2.0                                        | 151.4±12.1                                                                | 10.4±1.5                                     |                                        |
| G                                                     | 31                     | 90                                     | 60                              | 2353                         | 5                 | 6              | 5                      | 0.0                        | 0.7                                     | 31.8±8.9                                                              | 4.5±0.8                                                      | 561.1±2.4                                           | 118.0±0.5                                           | 118.2±0.5                                           | 3.0±2.0                                        | 8.6±0.6                                                                   | 4.3±0.3                                      | 0.62±0.02                              |
|                                                       |                        |                                        |                                 |                              | 10                | 6              | 10                     | 0.0                        | 1.2                                     | 66.9±17.4                                                             | 9.3±1.7                                                      | 542.2±2.3                                           | 118.1±0.5                                           | 118.4±0.5                                           | 3.2±2.1                                        | 7.5±0.5                                                                   | 3.7±0.3                                      | 1.28±0.04                              |
|                                                       |                        |                                        |                                 |                              | 15                | 6              | 15                     | 0.0                        | 1.4                                     | 86.0±22.6                                                             | 12.9±2.4                                                     | 532.4±2.3                                           | 117.6±0.5                                           | 117.9±0.5                                           | 3.2±2.2                                        | 7.2±0.5                                                                   | 3.6±0.2                                      | 1.92±0.06                              |
|                                                       |                        |                                        |                                 |                              | 20                | 6              | 20                     | 0.0                        | 2                                       | 108.7±28.3                                                            | 16.9±3.1                                                     | 517.5±2.3                                           | 117.6±0.5                                           | 117.5±0.5                                           | 3.2±2.2                                        | 6.7±0.5                                                                   | 3.4±0.2                                      | 2.59±0.08                              |
|                                                       |                        |                                        |                                 |                              | 10                | 3              | 10                     | 0.0                        | 2.3                                     | 79.1±19.4                                                             | 13.9±2.3                                                     | 566.7±2.3                                           | 121.4±0.5                                           | 121.4±0.5                                           | 3.2±2.1                                        | 7.5±0.5                                                                   | 3.7±0.3                                      | 2.79±0.08                              |
|                                                       |                        |                                        |                                 |                              | 10                | 11             | 10                     | 0.0                        | 0.7                                     | 44.8±14.0                                                             | 6.5±1.3                                                      | 514.5±2.3                                           | 113.4±0.5                                           | 111.9±0.5                                           | 3.0±2.0                                        | 6.0±0.4                                                                   | 3.0±0.2                                      | 0.67±0.02                              |
|                                                       |                        |                                        |                                 |                              | 10                | 16             | 10                     | 0.0                        | 0.6                                     | 35.6±12.5                                                             | 4.5±1.0                                                      | 489.6±2.3                                           | 108.4±0.5                                           | 107.9±0.5                                           | 2.8±1.9                                        | 5.1±0.3                                                                   | 2.5±0.2                                      | 0.47±0.02                              |
|                                                       |                        |                                        |                                 |                              | 10                | 21             | 10                     | 0.0                        | 0.6                                     | 29.4±11.6                                                             | 4.2±1.1                                                      | 465.7±2.2                                           | 104.8±0.5                                           | 103.8±0.5                                           | 2.7±1.8                                        | 4.3±0.3                                                                   | 2.2±0.1                                      | 0.37±0.01                              |
|                                                       |                        |                                        |                                 |                              | 10                | 6              | 20                     | 0.0                        | 1.4                                     | 95.8±26.4                                                             | 13.2±2.7                                                     | 499.0±2.3                                           | 114.1±0.5                                           | 114.6±0.5                                           | 3.3±2.2                                        | 5.7±0.4                                                                   | 2.8±0.2                                      | 1.53±0.06                              |
|                                                       |                        |                                        |                                 |                              | 10                | 6              | 40                     | 0.0                        | 1.6                                     | 113.4±40.6                                                            | 16.1±4.4                                                     | 436.0±2.3                                           | 110.5±0.6                                           | 111.7±0.6                                           | 3.7±2.5                                        | 3.6±0.2                                                                   | 1.8±0.1                                      | 1.87±0.09                              |
|                                                       |                        |                                        |                                 |                              | 10                | 6              | 80                     | 0.0                        | 1.7                                     | 170.7±83.2                                                            | 17.3±6.6                                                     | 402.1±3.0                                           | 106.0±0.8                                           | 107.3±0.8                                           | 4.6±3.1                                        | 1.8±0.1                                                                   | 0.9±0.1                                      | 2.47±0.15                              |
|                                                       |                        |                                        |                                 |                              | 10                | 6              | 10                     | 0.5                        | 1.2                                     | 68.6±17.9                                                             | 9.5±1.8                                                      | 542.2±2.3                                           | 118.0±0.5                                           | 118.2±0.5                                           | 3.2±2.1                                        | 7.4±0.5                                                                   | 3.7±0.2                                      | 1.30±0.04                              |
|                                                       |                        |                                        |                                 |                              | 10                | 6              | 10                     | 1.0                        | 1.5                                     | 94.4±25.8                                                             | 13.9±2.7                                                     | 514.3±2.4                                           | 116.3±0.5                                           | 116.4±0.5                                           | 3.4±2.3                                        | 5.7±0.4                                                                   | 2.8±0.2                                      | 1.58±0.05                              |
|                                                       |                        |                                        |                                 |                              | All               |                |                        |                            |                                         |                                                                       |                                                              |                                                     |                                                     |                                                     | 2.7±2.3                                        | 229.3±19.5                                                                | 22.6±3.5                                     |                                        |

<sup>1</sup> – The shape of the point-spread function (PSF) used in the simulation

<sup>2</sup> – Gaussian-shaped PSF with standard deviations of 180 nm in the x & y directions and 880 nm in the z direction. This PSF is the equivalent of the Numeric PSF used in this work, when comparing the energies of both PSFs

<sup>3</sup> – Numerically-calculated PSF. It is based on an excitation PSF calculated using the PSF Lab web server that was doubled. The convolution with the pinhole function was not considered as the simulations mimic measurements with overfilling of objective back aperture.

<sup>4</sup> – The calculated for 15 molecules in a rectangular box with varying volumes (see Table S1 for box dimensions).

<sup>5</sup> – The translational diffusion coefficients of the particles diffusing in a rectangular box.

<sup>6</sup> – The overall time in which 15 simulated molecules were diffusing in a rectangular box.

<sup>7</sup> – The background (BG) rate as was retrieved by from exponential function fitting to the slow process in the inter-photon time histogram. The simulated background from dark counts was 2300 Hz. The retrieved values were always higher than 2300 Hz, due to molecules diffusing outside the effective detection volume and emitting photons at a rate comparable to the BG rate. As the concentration decreased, so did the value of the retrieved BG rate, relative to the simulated BG rate due to dark counts.

| PSF<br>(G/N) | C (pM) | D<br>( $\mu\text{m}^2/\text{s}$ ) | Sim<br>time (s) | BG<br>rate<br>(Hz) | m   | F  | sz<br>th | w sz<br>(ms) | %<br>photonic<br>impurity | Fraction of<br>impure<br>bursts ( $\times 10^{-3}$ ) | Mean burst<br>impurity<br>( $\times 10^{-3}$ ) | Position<br>dispersion – z<br>(nm) | Position<br>dispersion –<br>x (nm) | Position<br>dispersion –<br>y (nm) | FCS<br>diffusion<br>time (ms) | FCS mean<br>molecules in<br>the PSF ( $\times 10^{-3}$ ) | P(N>1) ( $\times 10^{-3}$ ) | Mean burst width (ms) |
|--------------|--------|-----------------------------------|-----------------|--------------------|-----|----|----------|--------------|---------------------------|------------------------------------------------------|------------------------------------------------|------------------------------------|------------------------------------|------------------------------------|-------------------------------|----------------------------------------------------------|-----------------------------|-----------------------|
| G            | 15.5   | 90                                | 60              | 2339               | 5   | 6  | 5        | 0.0          | 0.4                       | 16.9 $\pm$ 8.2                                       | 3.2 $\pm$ 1.0                                  | 520.5 $\pm$ 3.0                    | 119.2 $\pm$ 0.7                    | 120.0 $\pm$ 0.7                    | 2.8 $\pm$ 1.9                 | 4.9 $\pm$ 0.3                                            | 2.5 $\pm$ 0.2               | 0.59 $\pm$ 0.02       |
|              |        |                                   |                 |                    | 10  | 6  | 10       | 0.0          | 0.6                       | 35.0 $\pm$ 17.5                                      | 5.4 $\pm$ 1.9                                  | 494.7 $\pm$ 2.9                    | 118.9 $\pm$ 0.7                    | 120.9 $\pm$ 0.7                    | 2.9 $\pm$ 2.0                 | 3.9 $\pm$ 0.3                                            | 2.0 $\pm$ 0.1               | 1.27 $\pm$ 0.06       |
|              |        |                                   |                 |                    | 15  | 6  | 15       | 0.0          | 0.7                       | 44.4 $\pm$ 22.1                                      | 6.1 $\pm$ 2.1                                  | 473.2 $\pm$ 2.8                    | 119.2 $\pm$ 0.7                    | 121.2 $\pm$ 0.7                    | 3.0 $\pm$ 2.0                 | 3.8 $\pm$ 0.3                                            | 1.9 $\pm$ 0.1               | 1.86 $\pm$ 0.08       |
|              |        |                                   |                 |                    | 20  | 6  | 20       | 0.0          | 0.7                       | 47.8 $\pm$ 25.5                                      | 7.5 $\pm$ 2.7                                  | 464.2 $\pm$ 2.8                    | 118.5 $\pm$ 0.7                    | 120.7 $\pm$ 0.7                    | 3.0 $\pm$ 2.1                 | 3.7 $\pm$ 0.3                                            | 1.8 $\pm$ 0.1               | 2.51 $\pm$ 0.11       |
|              |        |                                   |                 |                    | 10  | 3  | 10       | 0.0          | 0.8                       | 35.1 $\pm$ 17.5                                      | 6.4 $\pm$ 2.2                                  | 520.1 $\pm$ 2.9                    | 122.7 $\pm$ 0.7                    | 123.4 $\pm$ 0.7                    | 2.9 $\pm$ 2.0                 | 5.2 $\pm$ 0.4                                            | 2.6 $\pm$ 0.2               | 2.78 $\pm$ 0.10       |
|              |        |                                   |                 |                    | 10  | 11 | 10       | 0.0          | 0.4                       | 26.1 $\pm$ 14.6                                      | 3.8 $\pm$ 1.4                                  | 462.0 $\pm$ 2.8                    | 114.5 $\pm$ 0.7                    | 115.4 $\pm$ 0.7                    | 2.8 $\pm$ 1.9                 | 3.2 $\pm$ 0.2                                            | 1.6 $\pm$ 0.1               | 0.67 $\pm$ 0.03       |
|              |        |                                   |                 |                    | 10  | 16 | 10       | 0.0          | 0.3                       | 23.7 $\pm$ 13.9                                      | 2.7 $\pm$ 1.1                                  | 440.5 $\pm$ 2.7                    | 110.2 $\pm$ 0.7                    | 111.4 $\pm$ 0.7                    | 2.6 $\pm$ 1.8                 | 2.7 $\pm$ 0.2                                            | 1.4 $\pm$ 0.0               | 0.48 $\pm$ 0.02       |
|              |        |                                   |                 |                    | 10  | 21 | 10       | 0.0          | 0.3                       | 21.7 $\pm$ 13.3                                      | 2.7 $\pm$ 1.2                                  | 417.0 $\pm$ 2.7                    | 106.5 $\pm$ 0.7                    | 105.9 $\pm$ 0.7                    | 2.5 $\pm$ 1.7                 | 2.4 $\pm$ 0.2                                            | 1.1 $\pm$ 0.0               | 0.36 $\pm$ 0.02       |
|              |        |                                   |                 |                    | 10  | 6  | 20       | 0.0          | 0.7                       | 41.8 $\pm$ 24.4                                      | 6.2 $\pm$ 2.6                                  | 438.0 $\pm$ 2.7                    | 115.1 $\pm$ 0.7                    | 117.8 $\pm$ 0.7                    | 2.9 $\pm$ 2.0                 | 3.0 $\pm$ 0.2                                            | 1.5 $\pm$ 0.1               | 1.51 $\pm$ 0.08       |
|              |        |                                   |                 |                    | 10  | 6  | 40       | 0.0          | 0.8                       | 44.8 $\pm$ 35.5                                      | 6.5 $\pm$ 3.4                                  | 398.5 $\pm$ 2.9                    | 110.1 $\pm$ 0.8                    | 115.0 $\pm$ 0.8                    | 3.3 $\pm$ 2.3                 | 1.9 $\pm$ 0.1                                            | 1.0 $\pm$ 0.0               | 1.82 $\pm$ 0.12       |
|              |        |                                   |                 |                    | 10  | 6  | 80       | 0.0          | 1.1                       | 68.2 $\pm$ 77.5                                      | 10.8 $\pm$ 7.0                                 | 391.3 $\pm$ 4.0                    | 105.7 $\pm$ 1.1                    | 110.7 $\pm$ 1.1                    | 3.9 $\pm$ 3.0                 | 0.9 $\pm$ 0.1                                            | 0.4 $\pm$ 0.0               | 2.32 $\pm$ 0.23       |
|              |        |                                   |                 |                    | 10  | 6  | 10       | 0.5          | 0.7                       | 36.0 $\pm$ 17.9                                      | 5.5 $\pm$ 2.0                                  | 492.1 $\pm$ 2.9                    | 118.8 $\pm$ 0.7                    | 120.9 $\pm$ 0.7                    | 2.9 $\pm$ 2.0                 | 3.9 $\pm$ 0.3                                            | 1.9 $\pm$ 0.1               | 1.30 $\pm$ 0.06       |
|              |        |                                   |                 |                    | 10  | 6  | 10       | 1.0          | 0.8                       | 47.6 $\pm$ 25.4                                      | 6.6 $\pm$ 2.5                                  | 465.1 $\pm$ 3.0                    | 116.9 $\pm$ 0.7                    | 120.1 $\pm$ 0.8                    | 3.1 $\pm$ 2.2                 | 3.0 $\pm$ 0.2                                            | 1.5 $\pm$ 0.1               | 1.56 $\pm$ 0.07       |
|              |        |                                   |                 |                    | All |    |          |              |                           |                                                      |                                                |                                    |                                    |                                    | 2.5 $\pm$ 2.3                 | 341.8 $\pm$ 31.7                                         | 46.7 $\pm$ 7.7              |                       |
| G            | 62     | 22.5                              | 60              | 2340               | 5   | 6  | 5        | 0.0          | 1                         | 48.4 $\pm$ 10.0                                      | 9.6 $\pm$ 1.3                                  | 594.5 $\pm$ 1.8                    | 119.3 $\pm$ 0.4                    | 120.0 $\pm$ 0.4                    | 9.2 $\pm$ 6.1                 | 15.8 $\pm$ 1.0                                           | 7.9 $\pm$ 0.5               | 0.90 $\pm$ 0.03       |
|              |        |                                   |                 |                    | 10  | 6  | 10       | 0.0          | 1.5                       | 67.9 $\pm$ 16.0                                      | 12.5 $\pm$ 1.9                                 | 585.4 $\pm$ 1.8                    | 119.5 $\pm$ 0.4                    | 119.8 $\pm$ 0.4                    | 9.4 $\pm$ 6.3                 | 14.6 $\pm$ 0.9                                           | 7.3 $\pm$ 0.4               | 1.75 $\pm$ 0.07       |
|              |        |                                   |                 |                    | 15  | 6  | 15       | 0.0          | 1.6                       | 78.5 $\pm$ 19.6                                      | 13.5 $\pm$ 2.3                                 | 576.7 $\pm$ 1.7                    | 119.8 $\pm$ 0.4                    | 119.8 $\pm$ 0.4                    | 9.8 $\pm$ 6.5                 | 14.4 $\pm$ 0.9                                           | 7.2 $\pm$ 0.4               | 2.50 $\pm$ 0.10       |
|              |        |                                   |                 |                    | 20  | 6  | 20       | 0.0          | 1.8                       | 96.5 $\pm$ 23.7                                      | 16.1 $\pm$ 2.8                                 | 569.8 $\pm$ 1.7                    | 120.1 $\pm$ 0.3                    | 119.7 $\pm$ 0.4                    | 10.0 $\pm$ 6.6                | 14.3 $\pm$ 0.9                                           | 7.2 $\pm$ 0.4               | 3.26 $\pm$ 0.13       |
|              |        |                                   |                 |                    | 10  | 3  | 10       | 0.0          | 1.9                       | 79.1 $\pm$ 19.4                                      | 15.7 $\pm$ 2.3                                 | 609.7 $\pm$ 1.8                    | 123.7 $\pm$ 0.4                    | 124.0 $\pm$ 0.4                    | 10.0 $\pm$ 6.6                | 17.6 $\pm$ 1.1                                           | 8.8 $\pm$ 0.5               | 3.64 $\pm$ 0.13       |
|              |        |                                   |                 |                    | 10  | 11 | 10       | 0.0          | 1                         | 66.7 $\pm$ 15.0                                      | 12.0 $\pm$ 1.8                                 | 548.8 $\pm$ 1.7                    | 113.2 $\pm$ 0.4                    | 113.7 $\pm$ 0.4                    | 8.9 $\pm$ 5.9                 | 12.0 $\pm$ 0.8                                           | 6.0 $\pm$ 0.4               | 0.98 $\pm$ 0.04       |
|              |        |                                   |                 |                    | 10  | 16 | 10       | 0.0          | 0.8                       | 59.2 $\pm$ 13.7                                      | 10.2 $\pm$ 1.6                                 | 519.2 $\pm$ 1.7                    | 108.1 $\pm$ 0.4                    | 108.3 $\pm$ 0.4                    | 8.3 $\pm$ 5.4                 | 10.2 $\pm$ 0.6                                           | 5.1 $\pm$ 0.3               | 0.67 $\pm$ 0.03       |
|              |        |                                   |                 |                    | 10  | 21 | 10       | 0.0          | 0.7                       | 48.3 $\pm$ 12.4                                      | 8.4 $\pm$ 1.4                                  | 492.8 $\pm$ 1.7                    | 103.0 $\pm$ 0.4                    | 102.7 $\pm$ 0.4                    | 7.3 $\pm$ 4.8                 | 8.7 $\pm$ 0.5                                            | 4.3 $\pm$ 0.3               | 0.50 $\pm$ 0.02       |
|              |        |                                   |                 |                    | 10  | 6  | 20       | 0.0          | 1.5                       | 73.3 $\pm$ 20.7                                      | 13.0 $\pm$ 2.4                                 | 551.9 $\pm$ 1.7                    | 115.6 $\pm$ 0.4                    | 116.4 $\pm$ 0.4                    | 9.5 $\pm$ 6.3                 | 12.5 $\pm$ 0.8                                           | 6.2 $\pm$ 0.4               | 2.18 $\pm$ 0.09       |
|              |        |                                   |                 |                    | 10  | 6  | 40       | 0.0          | 1.6                       | 85.5 $\pm$ 28.0                                      | 14.2 $\pm$ 3.2                                 | 510.4 $\pm$ 1.7                    | 111.9 $\pm$ 0.4                    | 112.3 $\pm$ 0.4                    | 9.8 $\pm$ 6.5                 | 10.0 $\pm$ 0.6                                           | 5.0 $\pm$ 0.3               | 2.63 $\pm$ 0.12       |
|              |        |                                   |                 |                    | 10  | 6  | 80       | 0.0          | 1.8                       | 105.3 $\pm$ 40.1                                     | 18.2 $\pm$ 4.8                                 | 469.7 $\pm$ 1.7                    | 109.1 $\pm$ 0.4                    | 107.9 $\pm$ 0.4                    | 10.4 $\pm$ 6.9                | 7.4 $\pm$ 0.5                                            | 3.7 $\pm$ 0.2               | 3.17 $\pm$ 0.16       |
|              |        |                                   |                 |                    | 10  | 6  | 10       | 0.5          | 1.5                       | 68.3 $\pm$ 16.1                                      | 12.5 $\pm$ 1.9                                 | 585.6 $\pm$ 1.8                    | 119.4 $\pm$ 0.4                    | 119.7 $\pm$ 0.4                    | 9.5 $\pm$ 6.3                 | 14.6 $\pm$ 0.9                                           | 7.3 $\pm$ 0.4               | 1.75 $\pm$ 0.07       |
|              |        |                                   |                 |                    | 10  | 6  | 10       | 1.0          | 1.5                       | 71.5 $\pm$ 18.6                                      | 13.3 $\pm$ 2.3                                 | 572.0 $\pm$ 1.8                    | 117.4 $\pm$ 0.4                    | 117.8 $\pm$ 0.4                    | 9.6 $\pm$ 6.4                 | 13.3 $\pm$ 0.8                                           | 6.6 $\pm$ 0.4               | 2.02 $\pm$ 0.08       |
|              |        |                                   |                 |                    | All |    |          |              |                           |                                                      |                                                |                                    |                                    |                                    | 8.9 $\pm$ 6.8                 | 167.2 $\pm$ 11.9                                         | 12.5 $\pm$ 1.7              |                       |
| G            | 62     | 5.625                             | 180             | 2334               | 5   | 6  | 5        | 0.0          | 0.9                       | 34.9 $\pm$ 6.1                                       | 6.2 $\pm$ 0.7                                  | 582.6 $\pm$ 1.0                    | 117.2 $\pm$ 0.2                    | 119.2 $\pm$ 0.2                    | 35.1 $\pm$ 22.7               | 13.8 $\pm$ 0.8                                           | 6.9 $\pm$ 0.4               | 1.21 $\pm$ 0.06       |
|              |        |                                   |                 |                    | 10  | 6  | 10       | 0.0          | 1                         | 58.1 $\pm$ 12.1                                      | 7.6 $\pm$ 1.2                                  | 574.4 $\pm$ 1.0                    | 116.8 $\pm$ 0.2                    | 118.5 $\pm$ 0.2                    | 36.0 $\pm$ 23.3               | 12.7 $\pm$ 0.7                                           | 6.3 $\pm$ 0.3               | 2.76 $\pm$ 0.14       |
|              |        |                                   |                 |                    | 15  | 6  | 15       | 0.0          | 1.1                       | 67.2 $\pm$ 15.2                                      | 7.4 $\pm$ 1.4                                  | 568.9 $\pm$ 1.0                    | 116.8 $\pm$ 0.2                    | 118.8 $\pm$ 0.2                    | 36.1 $\pm$ 23.3               | 12.5 $\pm$ 0.7                                           | 6.2 $\pm$ 0.3               | 3.95 $\pm$ 0.20       |
|              |        |                                   |                 |                    | 20  | 6  | 20       | 0.0          | 1.1                       | 75.8 $\pm$ 17.9                                      | 8.0 $\pm$ 1.6                                  | 565.6 $\pm$ 1.0                    | 117.0 $\pm$ 0.2                    | 118.7 $\pm$ 0.2                    | 36.5 $\pm$ 23.5               | 12.4 $\pm$ 0.7                                           | 6.2 $\pm$ 0.3               | 5.01 $\pm$ 0.25       |
|              |        |                                   |                 |                    | 10  | 3  | 10       | 0.0          | 1.3                       | 61.9 $\pm$ 13.7                                      | 7.3 $\pm$ 1.3                                  | 599.2 $\pm$ 1.1                    | 121.2 $\pm$ 0.2                    | 123.5 $\pm$ 0.2                    | 37.9 $\pm$ 24.6               | 14.7 $\pm$ 0.8                                           | 7.3 $\pm$ 0.4               | 5.29 $\pm$ 0.25       |
|              |        |                                   |                 |                    | 10  | 11 | 10       | 0.0          | 0.9                       | 49.6 $\pm$ 9.5                                       | 8.0 $\pm$ 1.0                                  | 542.5 $\pm$ 1.0                    | 110.7 $\pm$ 0.2                    | 112.5 $\pm$ 0.2                    | 32.7 $\pm$ 21.0               | 10.8 $\pm$ 0.6                                           | 5.4 $\pm$ 0.3               | 1.35 $\pm$ 0.07       |
|              |        |                                   |                 |                    | 10  | 16 | 10       | 0.0          | 0.8                       | 43.4 $\pm$ 8.2                                       | 7.2 $\pm$ 0.9                                  | 516.2 $\pm$ 1.0                    | 105.2 $\pm$ 0.2                    | 106.5 $\pm$ 0.2                    | 30.1 $\pm$ 19.2               | 9.3 $\pm$ 0.5                                            | 4.6 $\pm$ 0.3               | 0.86 $\pm$ 0.04       |
|              |        |                                   |                 |                    | 10  | 21 | 10       | 0.0          | 0.7                       | 42.2 $\pm$ 7.7                                       | 6.7 $\pm$ 0.8                                  | 491.8 $\pm$ 1.0                    | 99.6 $\pm$ 0.2                     | 101.5 $\pm$ 0.2                    | 26.9 $\pm$ 17.2               | 7.9 $\pm$ 0.4                                            | 3.9 $\pm$ 0.2               | 0.61 $\pm$ 0.03       |
|              |        |                                   |                 |                    | 10  | 6  | 20       | 0.0          | 1.1                       | 80.0 $\pm$ 17.6                                      | 9.3 $\pm$ 1.6                                  | 554.9 $\pm$ 1.0                    | 114.2 $\pm$ 0.2                    | 115.6 $\pm$ 0.2                    | 34.8 $\pm$ 22.5               | 11.5 $\pm$ 0.6                                           | 5.7 $\pm$ 0.3               | 3.78 $\pm$ 0.19       |
|              |        |                                   |                 |                    | 10  | 6  | 40       | 0.0          | 1.1                       | 99.7 $\pm$ 23.4                                      | 11.8 $\pm$ 2.3                                 | 535.8 $\pm$ 1.0                    | 111.0 $\pm$ 0.2                    | 113.2 $\pm$ 0.2                    | 34.1 $\pm$ 22.0               | 10.4 $\pm$ 0.6                                           | 5.2 $\pm$ 0.3               | 4.74 $\pm$ 0.24       |
|              |        |                                   |                 |                    | 10  | 6  | 80       | 0.0          | 1.1                       | 110.8 $\pm$ 30.3                                     | 11.1 $\pm$ 2.6                                 | 511.3 $\pm$ 1.0                    | 107.3 $\pm$ 0.2                    | 109.6 $\pm$ 0.2                    | 33.6 $\pm$ 21.7               | 8.9 $\pm$ 0.5                                            | 4.4 $\pm$ 0.2               | 5.92 $\pm$ 0.31       |
|              |        |                                   |                 |                    | 10  | 6  | 10       | 0.5          | 1                         | 57.7 $\pm$ 12.1                                      | 7.3 $\pm$ 1.2                                  | 574.2 $\pm$ 1.0                    | 116.7 $\pm$ 0.2                    | 118.5 $\pm$ 0.2                    | 35.9 $\pm$ 23.2               | 12.7 $\pm$ 0.7                                           | 6.3 $\pm$ 0.3               | 2.77 $\pm$ 0.14       |
|              |        |                                   |                 |                    | 10  | 6  | 10       | 1.0          | 1                         | 66.1 $\pm$ 14.2                                      | 7.7 $\pm$ 1.3                                  | 566.2 $\pm$ 1.0                    | 115.4 $\pm$ 0.2                    | 117.4 $\pm$ 0.2                    | 35.4 $\pm$ 22.8               | 12.2 $\pm$ 0.7                                           | 6.1 $\pm$ 0.3               | 3.20 $\pm$ 0.16       |
|              |        |                                   |                 |                    | All |    |          |              |                           |                                                      |                                                |                                    |                                    |                                    | 35.5 $\pm$ 26.4               | 166.1 $\pm$ 10.6                                         | 12.6 $\pm$ 1.5              |                       |

<sup>8</sup> – The burst search time window of *m* consecutive photons

<sup>9</sup> – A number setting the threshold on the minimal multiplier of the photon rate, relative to the BG rate, above which, photons are considered part of a burst

<sup>10</sup> – The minimal amount of photons in a burst (its minimal size)

<sup>11</sup> – The minimal duration (width) of a burst from its first photon timestamp, till its last.

<sup>12</sup> – All the photons in all bursts that originated from molecules other than the main ones in bursts. No error values were calculated as it was simply a ratio of photons relative to all photons.

<sup>13</sup> – The fraction of photon bursts that included photons originating from molecules other than the main ones in bursts. Error values are based on the calculation of a 95% confidence interval.

<sup>14</sup> – The mean of the fraction of photons originating from molecules other than the main ones per burst, for all bursts. Error values are based on the calculation of the standard error.

<sup>15</sup> – The standard deviation of all molecule positions when emitting a photon, in the z coordinate. Error values are based on the calculation of the uncertainty of the standard error values.

<sup>16</sup> – The standard deviation of all molecule positions when emitting a photon, in the x coordinate. Error values are based on the calculation of the uncertainty of the standard error values.

<sup>17</sup> – The standard deviation of all molecule positions when emitting a photon, in the y coordinate. Error values are based on the calculation of the uncertainty of the standard error values.

<sup>18</sup> – The best fit value of the diffusion time through the effective detection volume, as it was recovered from a fit of a fluorescence autocorrelation model of 3D diffusion, to the photon timestamp autocorrelation functions.

Error values are the fitting errors.

| PSF (G/N) | C (pM) | D (μm <sup>2</sup> /s) | Sim time (s) | Bg rate (Hz) | m   | F  | Sz th | W sz (ms) | % photonic impurity | Fraction of impure bursts (x10 <sup>-3</sup> ) | Mean burst impurity (x10 <sup>-3</sup> ) | Position dispersion – z (nm) | Position dispersion – x (nm) | Position dispersion – y (nm) | FCS diffusion time (ms) | FCS mean molecules in the PSF (x10 <sup>-3</sup> ) | P(N>1) (x10 <sup>-3</sup> ) | Mean burst width (ms) |
|-----------|--------|------------------------|--------------|--------------|-----|----|-------|-----------|---------------------|------------------------------------------------|------------------------------------------|------------------------------|------------------------------|------------------------------|-------------------------|----------------------------------------------------|-----------------------------|-----------------------|
| G         | 62     | 5.625                  | 60           | 2338         | 5   | 6  | 5     | 0.0       | 0.7                 | 41.8±11.4                                      | 7.5±1.4                                  | 602.3±1.8                    | 117.5±0.4                    | 118.9±0.4                    | 33.0±21.5               | 15.4±0.9                                           | 7.7±0.4                     | 1.26±0.11             |
|           |        |                        |              |              | 10  | 6  | 10    | 0.0       | 0.8                 | 65.4±21.3                                      | 7.5±1.9                                  | 595.1±1.8                    | 117.5±0.4                    | 117.9±0.4                    | 33.6±22.0               | 14.2±0.8                                           | 7.1±0.4                     | 2.81±0.23             |
|           |        |                        |              |              | 15  | 6  | 15    | 0.0       | 0.9                 | 85.3±28.4                                      | 9.7±2.5                                  | 590.9±1.8                    | 117.4±0.4                    | 118.3±0.4                    | 33.8±22.1               | 14.1±0.8                                           | 7.0±0.4                     | 4.00±0.32             |
|           |        |                        |              |              | 20  | 6  | 20    | 0.0       | 0.9                 | 78.9±29.8                                      | 8.2±2.7                                  | 592.0±1.8                    | 117.2±0.4                    | 118.7±0.4                    | 34.5±22.5               | 14.2±0.8                                           | 7.1±0.4                     | 4.96±0.38             |
|           |        |                        |              |              | 10  | 3  | 10    | 0.0       | 0.9                 | 71.3±24.7                                      | 7.9±2.0                                  | 615.8±1.8                    | 121.3±0.4                    | 123.5±0.4                    | 35.5±23.3               | 16.4±0.9                                           | 8.2±0.5                     | 5.36±0.40             |
|           |        |                        |              |              | 10  | 11 | 10    | 0.0       | 0.7                 | 42.6±15.0                                      | 5.7±1.5                                  | 566.2±1.8                    | 110.8±0.3                    | 112.2±0.3                    | 30.2±19.7               | 12.1±0.7                                           | 6.0±0.3                     | 1.42±0.12             |
|           |        |                        |              |              | 10  | 16 | 10    | 0.0       | 0.7                 | 36.6±12.5                                      | 6.5±1.5                                  | 536.9±1.7                    | 106.1±0.3                    | 107.4±0.3                    | 27.9±18.2               | 10.4±0.6                                           | 5.2±0.3                     | 0.87±0.07             |
|           |        |                        |              |              | 10  | 21 | 10    | 0.0       | 0.6                 | 35.6±11.6                                      | 4.9±1.1                                  | 514.5±1.7                    | 101.2±0.3                    | 102.3±0.3                    | 24.8±16.1               | 8.9±0.5                                            | 4.5±0.3                     | 0.61±0.05             |
|           |        |                        |              |              | 10  | 6  | 20    | 0.0       | 0.8                 | 79.2±28.8                                      | 8.2±2.5                                  | 581.6±1.8                    | 114.1±0.3                    | 115.6±0.4                    | 32.3±21.1               | 13.0±0.7                                           | 6.5±0.4                     | 3.75±0.31             |
|           |        |                        |              |              | 10  | 6  | 40    | 0.0       | 0.8                 | 97.8±39.1                                      | 9.7±3.4                                  | 563.3±1.8                    | 111.1±0.3                    | 112.3±0.4                    | 31.8±20.7               | 11.6±0.7                                           | 5.8±0.3                     | 4.85±0.40             |
|           |        |                        |              |              | 10  | 6  | 80    | 0.0       | 0.7                 | 104.9±47.7                                     | 7.5±3.5                                  | 537.0±1.7                    | 109.0±0.4                    | 110.3±0.4                    | 31.4±20.4               | 10.3±0.6                                           | 5.1±0.3                     | 5.76±0.49             |
|           |        |                        |              |              | 10  | 6  | 10    | 0.5       | 0.8                 | 65.4±21.3                                      | 7.5±1.9                                  | 595.1±1.8                    | 117.5±0.4                    | 117.9±0.4                    | 33.6±22.0               | 14.2±0.8                                           | 7.1±0.4                     | 2.81±0.23             |
|           |        |                        |              |              | 10  | 6  | 10    | 1.0       | 0.8                 | 78.0±25.7                                      | 8.8±2.2                                  | 589.9±1.8                    | 116.0±0.4                    | 116.6±0.4                    | 32.9±21.6               | 13.7±0.8                                           | 6.8±0.4                     | 3.26±0.27             |
|           |        |                        |              |              | All |    |       |           |                     |                                                |                                          |                              |                              |                              | 33.0±24.7               | 16.6±10.6                                          | 12.3±1.5                    |                       |
| N         | 62     | 90                     | 180          | 2483         | 5   | 6  | 5     | 0.0       | 2.1                 | 133.4±9.2                                      | 25.6±1.2                                 | 466.3±1.3                    | 134.6±0.4                    | 134.0±0.4                    | 1.7±1.1                 | 7.8±0.6                                            | 3.9±0.3                     | 0.50±0.01             |
|           |        |                        |              |              | 10  | 6  | 10    | 0.0       | 2.7                 | 228.3±16.7                                     | 27.7±1.6                                 | 411.1±1.2                    | 121.6±0.3                    | 118.4±0.3                    | 1.8±1.2                 | 5.9±0.4                                            | 2.9±0.2                     | 1.07±0.02             |
|           |        |                        |              |              | 15  | 6  | 15    | 0.0       | 3.2                 | 304.4±21.7                                     | 32.4±1.9                                 | 407.5±1.2                    | 126.9±0.4                    | 122.9±0.4                    | 1.8±1.2                 | 5.4±0.4                                            | 2.7±0.2                     | 1.65±0.03             |
|           |        |                        |              |              | 20  | 6  | 20    | 0.0       | 3.6                 | 352.1±25.7                                     | 37.0±2.4                                 | 402.8±1.3                    | 129.0±0.4                    | 124.7±0.4                    | 1.9±1.3                 | 4.9±0.3                                            | 2.5±0.2                     | 2.20±0.03             |
|           |        |                        |              |              | 10  | 3  | 10    | 0.0       | 3.9                 | 356.5±18.0                                     | 50.4±2.0                                 | 500.3±1.3                    | 156.2±0.4                    | 154.6±0.4                    | 1.8±1.2                 | 9.6±0.7                                            | 4.8±0.4                     | 2.45±0.03             |
|           |        |                        |              |              | 10  | 11 | 10    | 0.0       | 1.9                 | 149.9±14.3                                     | 18.4±1.3                                 | 362.7±1.1                    | 102.0±0.3                    | 99.1±0.3                     | 1.7±1.1                 | 4.3±0.3                                            | 2.2±0.2                     | 0.54±0.01             |
|           |        |                        |              |              | 10  | 16 | 10    | 0.0       | 1.7                 | 120.7±13.4                                     | 14.2±1.2                                 | 338.8±1.1                    | 94.5±0.3                     | 92.4±0.3                     | 1.6±1.1                 | 3.4±0.2                                            | 1.7±0.1                     | 0.37±0.01             |
|           |        |                        |              |              | 10  | 21 | 10    | 0.0       | 1.5                 | 100.6±12.7                                     | 11.9±1.1                                 | 321.9±1.1                    | 90.2±0.3                     | 85.5±0.3                     | 1.6±1.0                 | 2.9±0.2                                            | 1.4±0.1                     | 0.28±0.01             |
|           |        |                        |              |              | 10  | 6  | 20    | 0.0       | 2.9                 | 265.1±24.7                                     | 27.3±2.2                                 | 363.9±1.2                    | 112.7±0.4                    | 108.8±0.4                    | 1.9±1.3                 | 3.7±0.3                                            | 1.8±0.1                     | 1.30±0.03             |
|           |        |                        |              |              | 10  | 6  | 40    | 0.0       | 3.8                 | 315.6±45.1                                     | 36.3±4.6                                 | 316.8±1.4                    | 105.2±0.5                    | 96.7±0.4                     | 2.3±1.6                 | 1.7±0.1                                            | 0.8±0.1                     | 1.65±0.04             |
|           |        |                        |              |              | 10  | 6  | 80    | 0.0       | 7                   | 444.4±136.9                                    | 72.8±18.8                                | 286.0±2.7                    | 93.3±0.9                     | 85.9±0.8                     | 3.1±2.3                 | 0.3±0.0                                            | 0.2±0.0                     | 2.20±0.15             |
|           |        |                        |              |              | 10  | 6  | 10    | 0.5       | 2.7                 | 234.1±17.2                                     | 28.5±1.6                                 | 411.6±1.2                    | 121.9±0.4                    | 118.8±0.3                    | 1.8±1.2                 | 5.7±0.4                                            | 2.9±0.2                     | 1.10±0.02             |
|           |        |                        |              |              | 10  | 6  | 10    | 1.0       | 3.2                 | 270.5±24.5                                     | 31.9±2.3                                 | 386.6±1.3                    | 116.5±0.4                    | 111.6±0.4                    | 2.0±1.3                 | 3.8±0.3                                            | 1.9±0.1                     | 1.38±0.02             |
|           |        |                        |              |              | All |    |       |           |                     |                                                |                                          |                              |                              |                              | 1.5±1.3                 | 327.6±31.0                                         | 43.3±7.3                    |                       |
| N         | 62     | 90                     | 60           | 2474         | 5   | 6  | 5     | 0.0       | 2                   | 129.0±16.2                                     | 23.5±2.0                                 | 458.9±2.2                    | 134.3±0.7                    | 133.7±0.7                    | 1.6±1.1                 | 7.1±0.5                                            | 3.6±0.3                     | 0.50±0.01             |
|           |        |                        |              |              | 10  | 6  | 10    | 0.0       | 2.6                 | 232.2±30.7                                     | 25.2±2.5                                 | 402.4±2.1                    | 122.7±0.6                    | 114.5±0.6                    | 1.6±1.2                 | 5.3±0.4                                            | 2.6±0.2                     | 1.10±0.03             |
|           |        |                        |              |              | 15  | 6  | 15    | 0.0       | 3                   | 303.4±39.1                                     | 29.5±3.2                                 | 400.0±2.1                    | 125.6±0.7                    | 121.6±0.6                    | 1.7±1.2                 | 4.9±0.4                                            | 2.4±0.2                     | 1.65±0.05             |
|           |        |                        |              |              | 20  | 6  | 20    | 0.0       | 3.4                 | 358.4±47.3                                     | 34.4±4.1                                 | 391.9±2.2                    | 124.5±0.7                    | 124.3±0.7                    | 1.8±1.2                 | 4.3±0.3                                            | 2.1±0.2                     | 2.23±0.07             |
|           |        |                        |              |              | 10  | 3  | 10    | 0.0       | 3.6                 | 361.7±32.0                                     | 49.5±3.4                                 | 501.6±2.4                    | 160.8±0.8                    | 160.2±0.8                    | 1.7±1.2                 | 9.0±0.7                                            | 4.5±0.3                     | 2.45±0.05             |
|           |        |                        |              |              | 10  | 11 | 10    | 0.0       | 2.1                 | 154.4±26.2                                     | 18.0±2.2                                 | 357.9±2.0                    | 105.5±0.6                    | 98.3±0.5                     | 1.6±1.1                 | 3.9±0.3                                            | 1.9±0.1                     | 0.55±0.02             |
|           |        |                        |              |              | 10  | 16 | 10    | 0.0       | 2                   | 124.1±24.6                                     | 13.9±2.0                                 | 329.7±1.9                    | 95.1±0.6                     | 92.1±0.5                     | 1.5±1.1                 | 3.1±0.2                                            | 1.5±0.1                     | 0.37±0.01             |
|           |        |                        |              |              | 10  | 21 | 10    | 0.0       | 1.9                 | 105.7±23.5                                     | 13.3±2.1                                 | 309.2±1.9                    | 86.7±0.5                     | 84.6±0.5                     | 1.5±1.0                 | 2.5±0.2                                            | 1.3±0.1                     | 0.28±0.01             |
|           |        |                        |              |              | 10  | 6  | 20    | 0.0       | 2.8                 | 261.0±45.3                                     | 22.8±3.4                                 | 355.9±2.1                    | 112.7±0.7                    | 105.5±0.6                    | 1.8±1.2                 | 3.3±0.2                                            | 1.6±0.1                     | 1.35±0.05             |
|           |        |                        |              |              | 10  | 6  | 40    | 0.0       | 4                   | 357.7±85.9                                     | 33.4±8.0                                 | 317.4±2.5                    | 104.0±0.8                    | 99.2±0.8                     | 2.3±1.6                 | 1.5±0.1                                            | 0.8±0.1                     | 1.76±0.09             |
|           |        |                        |              |              | 10  | 6  | 80    | 0.0       | 7.8                 | 521.7±220.9                                    | 73.1±29.6                                | 329.2±4.8                    | 108.5±1.6                    | 115.4±1.6                    | 4.0±2.7                 | 0.5±0.0                                            | 0.2±0.0                     | 2.21±0.25             |
|           |        |                        |              |              | 10  | 6  | 10    | 0.5       | 2.7                 | 240.7±31.8                                     | 26.2±2.6                                 | 401.9±2.1                    | 123.5±0.6                    | 115.2±0.6                    | 1.7±1.2                 | 5.1±0.4                                            | 2.6±0.2                     | 1.14±0.03             |
|           |        |                        |              |              | 10  | 6  | 10    | 1.0       | 3.1                 | 291.0±44.6                                     | 30.2±3.8                                 | 386.2±2.3                    | 123.1±0.7                    | 112.9±0.7                    | 1.8±1.3                 | 3.5±0.3                                            | 1.8±0.1                     | 1.41±0.04             |
|           |        |                        |              |              | All |    |       |           |                     |                                                |                                          |                              |                              |                              | 1.4±1.3                 | 327.9±32.4                                         | 43.3±7.7                    |                       |

<sup>19</sup> - The best fit value of the average number of molecules traversing the effective detection volume at any given moment, as it was recovered from a fit of a fluorescence autocorrelation model of 3D diffusion, to the photon timestamp autocorrelation functions. Error values are the fitting errors.

<sup>20</sup> – The probability of having more than 1 molecule traverse the beam. It was calculated out of the best fit value of the average number of molecules traversing the effective detection volume at any moments.

The calculation was performed differently for all photons and for photons in bursts (see explanations 22 & 24). The error values are propagated from the error values of the average number of molecules in the effective detection volume.

<sup>21</sup> – The mean of all burst widths.

<sup>22</sup> – The photon timestamp autocorrelation function was based only on burst photons, hence on events of at least 1 molecule. Therefore, the probability of having >1 molecule was calculated as the Poisson probability of >1 molecule, relative to the Poisson probability of having >0 molecule

<sup>23</sup> – The FCS calculations were performed for all photons, including ones that were outside bursts.

<sup>24</sup> - The photon timestamp autocorrelation function was based only all photons, hence on events of 0 molecules (background) or more. Therefore, the probability of having >1 molecule was calculated as the Poisson probability of >1 molecule

| PSF (G/N) | C (pM) | D (μm²/s) | Sim time (s) | Bg rate (Hz) | m   | F  | Sz th | W sz (ms) | % photonic impurity | Fraction of impure bursts (x10 <sup>-3</sup> ) | Mean burst impurity (x10 <sup>-3</sup> ) | Position dispersion – z (nm) | Position dispersion – x (nm) | Position dispersion – y (nm) | FCS diffusion time (ms) | FCS mean molecules in the PSF (x10 <sup>-3</sup> ) | P(N>1) (x10 <sup>-3</sup> ) | Mean burst width (ms) |
|-----------|--------|-----------|--------------|--------------|-----|----|-------|-----------|---------------------|------------------------------------------------|------------------------------------------|------------------------------|------------------------------|------------------------------|-------------------------|----------------------------------------------------|-----------------------------|-----------------------|
| N         | 31     | 90        | 60           | 2382         | 5   | 6  | 5     | 0.0       | 0.8                 | 63.9±15.4                                      | 11.7±1.8                                 | 422.2±2.8                    | 120.7±0.8                    | 121.2±0.8                    | 1.5±1.0                 | 4.1±0.3                                            | 2.1±0.2                     | 0.49±0.02             |
|           |        |           |              |              | 10  | 6  | 10    | 0.0       | 0.9                 | 116.2±31.0                                     | 11.8±2.3                                 | 384.8±2.7                    | 105.4±0.7                    | 110.7±0.8                    | 1.6±1.1                 | 3.0±0.2                                            | 1.5±0.1                     | 1.10±0.04             |
|           |        |           |              |              | 15  | 6  | 15    | 0.0       | 1.2                 | 152.5±41.2                                     | 14.0±2.9                                 | 363.3±2.6                    | 104.0±0.8                    | 104.6±0.8                    | 1.6±1.1                 | 2.7±0.2                                            | 1.4±0.1                     | 1.69±0.07             |
|           |        |           |              |              | 20  | 6  | 20    | 0.0       | 1.3                 | 169.5±48.2                                     | 15.6±3.5                                 | 363.3±2.7                    | 105.6±0.8                    | 107.0±0.8                    | 1.7±1.2                 | 2.5±0.2                                            | 1.3±0.1                     | 2.25±0.09             |
|           |        |           |              |              | 10  | 3  | 10    | 0.0       | 1.5                 | 163.5±33.3                                     | 21.0±3.1                                 | 455.1±3.0                    | 133.9±0.9                    | 136.3±0.9                    | 1.7±1.1                 | 5.0±0.4                                            | 2.5±0.2                     | 2.52±0.07             |
|           |        |           |              |              | 10  | 11 | 10    | 0.0       | 0.7                 | 70.4±25.2                                      | 75.4±1.9                                 | 337.8±2.5                    | 89.4±0.7                     | 92.3±0.7                     | 1.6±1.1                 | 2.2±0.2                                            | 1.1±0.1                     | 0.56±0.02             |
|           |        |           |              |              | 10  | 16 | 10    | 0.0       | 0.6                 | 46.2±20.9                                      | 50.3±1.5                                 | 314.6±2.5                    | 84.7±0.7                     | 82.6±0.7                     | 1.6±1.0                 | 1.8±0.1                                            | 0.9±0.1                     | 0.38±0.02             |
|           |        |           |              |              | 10  | 21 | 10    | 0.0       | 0.5                 | 43.8±20.5                                      | 6.8±2.0                                  | 303.2±2.5                    | 82.2±0.7                     | 79.8±0.7                     | 1.5±1.0                 | 1.5±0.1                                            | 0.8±0.1                     | 0.29±0.01             |
|           |        |           |              |              | 10  | 6  | 20    | 0.0       | 1                   | 137.6±46.1                                     | 11.3±2.8                                 | 340.4±2.7                    | 95.8±0.8                     | 98.7±0.8                     | 1.7±1.2                 | 1.9±0.1                                            | 1.0±0.1                     | 1.31±0.06             |
|           |        |           |              |              | 10  | 6  | 40    | 0.0       | 1                   | 147.1±86.3                                     | 10.5±5.6                                 | 289.7±3.3                    | 86.0±1.0                     | 84.0±0.9                     | 2.3±1.6                 | 0.9±0.1                                            | 0.5±0.0                     | 1.67±0.13             |
|           |        |           |              |              | 10  | 6  | 80    | 0.0       | 0.9                 | 200.0±301.6                                    | 8.1±7.0                                  | 249.9±5.8                    | 85.1±2.0                     | 86.2±2.0                     | 3.3±2.1                 | 0.2±0.0                                            | 0.1±0.0                     | 2.20±0.54             |
|           |        |           |              |              | 10  | 6  | 10    | 0.5       | 0.9                 | 121.2±32.3                                     | 12.3±2.4                                 | 385.8±2.7                    | 105.6±0.8                    | 111.1±0.8                    | 1.6±1.1                 | 2.9±0.2                                            | 1.5±0.1                     | 1.13±0.04             |
|           |        |           |              |              | 10  | 6  | 10    | 1.0       | 1.1                 | 157.9±47.7                                     | 15.6±3.5                                 | 371.3±3.1                    | 102.3±0.8                    | 106.7±0.9                    | 1.7±1.2                 | 2.0±0.1                                            | 1.0±0.1                     | 1.39±0.05             |
|           |        |           |              |              | All |    |       |           |                     |                                                |                                          |                              |                              |                              | 1.3±1.4                 | 518.7±58.4                                         | 95.9±18.0                   |                       |
| N         | 15.5   | 90        | 60           | 2358         | 5   | 6  | 5     | 0.0       | 0.5                 | 24.4±12.2                                      | 6.0±1.8                                  | 481.4±4.8                    | 142.3±1.4                    | 127.4±1.3                    | 1.7±1.1                 | 2.6±0.2                                            | 1.3±1.2                     | 0.46±0.02             |
|           |        |           |              |              | 10  | 6  | 10    | 0.0       | 0.8                 | 52.6±32.0                                      | 8.6±3.7                                  | 417.4±4.4                    | 115.0±1.2                    | 107.2±1.1                    | 1.7±1.1                 | 1.3±0.1                                            | 0.7±0.6                     | 1.08±0.06             |
|           |        |           |              |              | 15  | 6  | 15    | 0.0       | 1                   | 75.8±45.7                                      | 11.4±5.2                                 | 377.4±4.2                    | 117.5±1.3                    | 108.5±1.2                    | 1.8±1.1                 | 1.2±0.1                                            | 0.6±0.6                     | 1.73±0.09             |
|           |        |           |              |              | 20  | 6  | 20    | 0.0       | 1                   | 90.0±57.1                                      | 11.2±5.9                                 | 349.1±4.0                    | 108.0±1.2                    | 106.3±1.2                    | 1.9±1.2                 | 1.1±0.1                                            | 0.6±0.5                     | 2.36±0.14             |
|           |        |           |              |              | 10  | 3  | 10    | 0.0       | 0.8                 | 78.3±35.0                                      | 9.8±3.2                                  | 475.8±4.7                    | 134.8±1.3                    | 134.4±1.3                    | 1.8±1.1                 | 2.4±0.2                                            | 1.2±1.1                     | 2.50±0.10             |
|           |        |           |              |              | 10  | 11 | 10    | 0.0       | 0.6                 | 33.3±26.5                                      | 6.9±3.5                                  | 327.0±3.7                    | 86.4±1.0                     | 90.8±1.0                     | 1.5±1.0                 | 1.0±0.1                                            | 0.5±0.4                     | 0.55±0.03             |
|           |        |           |              |              | 10  | 16 | 10    | 0.0       | 0.4                 | 18.8±21.2                                      | 3.1±2.7                                  | 296.0±3.6                    | 79.8±1.0                     | 82.3±1.0                     | 1.4±0.9                 | 0.7±0.0                                            | 0.4±0.3                     | 0.39±0.03             |
|           |        |           |              |              | 10  | 21 | 10    | 0.0       | 0.3                 | 19.7±22.4                                      | 3.4±2.7                                  | 280.4±3.5                    | 77.0±1.0                     | 78.1±1.0                     | 1.4±0.9                 | 0.6±0.0                                            | 0.3±0.3                     | 0.30±0.02             |
|           |        |           |              |              | 10  | 6  | 20    | 0.0       | 0.9                 | 64.5±50.9                                      | 10.4±6.1                                 | 319.1±3.9                    | 98.2±1.2                     | 95.8±1.2                     | 1.9±1.2                 | 0.8±0.1                                            | 0.4±0.4                     | 1.29±0.07             |
|           |        |           |              |              | 10  | 6  | 40    | 0.0       | 0.3                 | 71.4±101.7                                     | 3.6±3.1                                  | 262.0±4.8                    | 91.0±1.7                     | 84.0±1.5                     | 2.4±1.6                 | 0.3±0.0                                            | 0.2±0.2                     | 1.58±0.17             |
|           |        |           |              |              | 10  | 6  | 80    | 0.0       | 0.3                 |                                                |                                          | 195.6±8.8                    | 74.2±3.4                     | 80.9±3.7                     |                         |                                                    |                             | 1.59±1.42             |
|           |        |           |              |              | 10  | 6  | 10    | 0.5       | 0.8                 | 55.6±33.8                                      | 9.1±4.0                                  | 423.8±4.6                    | 116.3±1.2                    | 107.9±1.2                    | 1.7±1.1                 | 1.3±0.1                                            | 0.6±0.6                     | 1.12±0.06             |
|           |        |           |              |              | 10  | 6  | 10    | 1.0       | 0.9                 | 66.0±48.1                                      | 10.0±5.4                                 | 377.3±4.7                    | 102.0±1.3                    | 105.1±1.3                    | 1.8±1.1                 | 0.9±0.1                                            | 0.4±0.4                     | 1.36±0.06             |
|           |        |           |              |              | All |    |       |           |                     |                                                |                                          |                              |                              |                              | 1.5±2.0                 | 1059±150.9                                         | 285.9±55.2                  |                       |
| N         | 62     | 22.5      | 60           | 2456         | 5   | 6  | 5     | 0.0       | 1.2                 | 125.3±19.1                                     | 24.1±2.4                                 | 472.2±2.3                    | 125.9±0.6                    | 125.8±0.6                    | 5.2±3.2                 | 7.1±0.4                                            | 3.5±3.3                     | 0.64±0.03             |
|           |        |           |              |              | 10  | 6  | 10    | 0.0       | 1.3                 | 190.2±35.7                                     | 21.4±3.2                                 | 415.9±2.1                    | 106.1±0.5                    | 105.0±0.5                    | 5.4±3.4                 | 5.6±0.3                                            | 2.8±2.6                     | 1.45±0.07             |
|           |        |           |              |              | 15  | 6  | 15    | 0.0       | 1.3                 | 223.5±43.4                                     | 18.2±3.2                                 | 397.9±2.0                    | 104.7±0.5                    | 104.8±0.5                    | 5.6±3.5                 | 5.4±0.3                                            | 2.7±2.5                     | 2.07±0.09             |
|           |        |           |              |              | 20  | 6  | 20    | 0.0       | 1.7                 | 274.0±51.5                                     | 21.0±3.8                                 | 395.3±2.0                    | 109.4±0.6                    | 108.2±0.5                    | 5.7±3.6                 | 5.3±0.3                                            | 2.6±2.5                     | 2.73±0.12             |
|           |        |           |              |              | 10  | 3  | 10    | 0.0       | 2.1                 | 307.1±39.7                                     | 34.6±3.7                                 | 496.1±2.3                    | 139.9±0.6                    | 136.3±0.6                    | 5.8±3.7                 | 8.4±0.5                                            | 4.2±3.9                     | 3.04±0.12             |
|           |        |           |              |              | 10  | 11 | 10    | 0.0       | 0.7                 | 125.5±30.3                                     | 11.8±2.2                                 | 360.9±1.9                    | 89.4±0.5                     | 91.3±0.5                     | 5.0±3.1                 | 4.3±0.3                                            | 2.1±2.0                     | 0.82±0.04             |
|           |        |           |              |              | 10  | 16 | 10    | 0.0       | 0.6                 | 94.9±25.9                                      | 9.6±2.0                                  | 344.7±1.9                    | 86.5±0.5                     | 86.6±0.5                     | 4.7±3.0                 | 3.6±0.2                                            | 1.8±1.7                     | 0.56±0.03             |
|           |        |           |              |              | 10  | 21 | 10    | 0.0       | 0.4                 | 74.1±23.3                                      | 7.1±1.7                                  | 323.0±1.9                    | 78.7±0.5                     | 80.3±0.5                     | 4.2±2.6                 | 3.0±0.2                                            | 1.5±1.4                     | 0.43±0.02             |
|           |        |           |              |              | 10  | 6  | 20    | 0.0       | 1.2                 | 196.6±45.6                                     | 15.8±3.4                                 | 372.9±2.0                    | 98.4±0.5                     | 96.2±0.5                     | 5.3±3.4                 | 4.5±0.3                                            | 2.2±2.1                     | 1.76±0.08             |
|           |        |           |              |              | 10  | 6  | 40    | 0.0       | 1.3                 | 222.9±62.3                                     | 18.1±5.2                                 | 346.2±2.0                    | 93.8±0.5                     | 91.0±0.5                     | 5.6±3.6                 | 3.3±0.2                                            | 1.7±1.6                     | 2.10±0.11             |
|           |        |           |              |              | 10  | 6  | 80    | 0.0       | 0.9                 | 208.3±96.1                                     | 11.7±7.2                                 | 292.7±2.1                    | 82.6±0.6                     | 83.6±0.6                     | 6.6±4.0                 | 1.8±0.1                                            | 0.9±0.9                     | 2.60±0.19             |
|           |        |           |              |              | 10  | 6  | 10    | 0.5       | 1.3                 | 191.4±35.9                                     | 21.5±3.2                                 | 415.9±2.1                    | 106.1±0.5                    | 105.0±0.5                    | 5.4±3.4                 | 5.6±0.3                                            | 2.8±2.6                     | 1.46±0.07             |
|           |        |           |              |              | 10  | 6  | 10    | 1.0       | 1.3                 | 195.1±43.1                                     | 18.0±3.5                                 | 393.5±2.1                    | 100.9±0.5                    | 99.2±0.5                     | 5.6±3.4                 | 4.7±0.3                                            | 2.3±2.2                     | 1.72±0.08             |
|           |        |           |              |              | All |    |       |           |                     |                                                |                                          |                              |                              |                              | 5.0±4.2                 | 337.8±27.5                                         | 45.7±6.6                    |                       |

| PSF (G/N) | C (pM) | D ( $\mu\text{m}^2/\text{s}$ ) | Sim time (s) | Bg rate (Hz) | m   | F  | Sz th | W sz (ms) | % photonic impurity | Fraction of impure bursts ( $\times 10^{-3}$ ) | Mean burst impurity ( $\times 10^{-3}$ ) | Position dispersion – z (nm) | Position dispersion – x (nm) | Position dispersion – y (nm) | FCS diffusion time (ms) | FCS mean molecules in the PSF ( $\times 10^{-3}$ ) | P(N>1) ( $\times 10^{-3}$ ) | Mean burst width (ms) |
|-----------|--------|--------------------------------|--------------|--------------|-----|----|-------|-----------|---------------------|------------------------------------------------|------------------------------------------|------------------------------|------------------------------|------------------------------|-------------------------|----------------------------------------------------|-----------------------------|-----------------------|
| N         | 62     | 5.625                          | 180          | 2431         | 5   | 6  | 5     | 0.0       | 0.7                 | 105.2 $\pm$ 11.6                               | 21.4 $\pm$ 1.6                           | 460.2 $\pm$ 1.3              | 127.0 $\pm$ 0.4              | 126.2 $\pm$ 0.4              | 19.1 $\pm$ 12.2         | 6.4 $\pm$ 0.4                                      | 3.2 $\pm$ 0.2               | 0.75 $\pm$ 0.04       |
|           |        |                                |              |              | 10  | 6  | 10    | 0.0       | 0.7                 | 189.8 $\pm$ 27.1                               | 15.4 $\pm$ 2.1                           | 407.5 $\pm$ 1.2              | 103.8 $\pm$ 0.3              | 102.3 $\pm$ 0.3              | 19.8 $\pm$ 12.6         | 4.9 $\pm$ 0.3                                      | 2.4 $\pm$ 0.1               | 2.02 $\pm$ 0.12       |
|           |        |                                |              |              | 15  | 6  | 15    | 0.0       | 0.7                 | 247.3 $\pm$ 36.0                               | 11.2 $\pm$ 1.8                           | 393.1 $\pm$ 1.2              | 102.7 $\pm$ 0.3              | 102.1 $\pm$ 0.3              | 205 $\pm$ 13.2          | 4.7 $\pm$ 0.3                                      | 2.4 $\pm$ 0.1               | 2.99 $\pm$ 0.17       |
|           |        |                                |              |              | 20  | 6  | 20    | 0.0       | 0.8                 | 291.7 $\pm$ 43.0                               | 12.2 $\pm$ 2.2                           | 385.9 $\pm$ 1.1              | 102.8 $\pm$ 0.3              | 101.9 $\pm$ 0.3              | 20.7 $\pm$ 13.2         | 4.7 $\pm$ 0.3                                      | 2.3 $\pm$ 0.1               | 3.94 $\pm$ 0.24       |
|           |        |                                |              |              | 10  | 3  | 10    | 0.0       | 1.1                 | 295.2 $\pm$ 27.5                               | 37.5 $\pm$ 2.9                           | 497.3 $\pm$ 1.4              | 137.0 $\pm$ 0.4              | 136.4 $\pm$ 0.4              | 21.6 $\pm$ 13.8         | 7.4 $\pm$ 0.4                                      | 3.7 $\pm$ 0.2               | 3.65 $\pm$ 0.15       |
|           |        |                                |              |              | 10  | 11 | 10    | 0.0       | 0.5                 | 134.4 $\pm$ 23.0                               | 8.1 $\pm$ 1.2                            | 349.4 $\pm$ 1.1              | 91.1 $\pm$ 0.3               | 92.3 $\pm$ 0.3               | 18.2 $\pm$ 11.6         | 3.9 $\pm$ 0.2                                      | 1.9 $\pm$ 0.1               | 1.16 $\pm$ 0.07       |
|           |        |                                |              |              | 10  | 16 | 10    | 0.0       | 0.4                 | 103.9 $\pm$ 19.8                               | 6.7 $\pm$ 1.1                            | 325.6 $\pm$ 1.0              | 85.0 $\pm$ 0.3               | 86.5 $\pm$ 0.3               | 16.2 $\pm$ 10.3         | 3.3 $\pm$ 0.2                                      | 1.6 $\pm$ 0.1               | 0.79 $\pm$ 0.05       |
|           |        |                                |              |              | 10  | 21 | 10    | 0.0       | 0.4                 | 83.3 $\pm$ 17.2                                | 5.2 $\pm$ 1.0                            | 308.0 $\pm$ 1.0              | 79.7 $\pm$ 0.3               | 81.9 $\pm$ 0.3               | 15.0 $\pm$ 9.5          | 2.9 $\pm$ 0.2                                      | 1.4 $\pm$ 0.1               | 0.58 $\pm$ 0.04       |
|           |        |                                |              |              | 10  | 6  | 20    | 0.0       | 0.6                 | 251.7 $\pm$ 41.0                               | 11.5 $\pm$ 2.3                           | 363.4 $\pm$ 1.1              | 97.0 $\pm$ 0.3               | 96.1 $\pm$ 0.3               | 19.2 $\pm$ 12.3         | 4.1 $\pm$ 0.2                                      | 2.1 $\pm$ 0.1               | 2.94 $\pm$ 0.18       |
|           |        |                                |              |              | 10  | 6  | 40    | 0.0       | 0.6                 | 274.8 $\pm$ 50.6                               | 8.9 $\pm$ 2.2                            | 339.2 $\pm$ 1.1              | 92.7 $\pm$ 0.3               | 92.7 $\pm$ 0.3               | 18.9 $\pm$ 12.0         | 3.6 $\pm$ 0.2                                      | 1.8 $\pm$ 0.1               | 3.56 $\pm$ 0.22       |
|           |        |                                |              |              | 10  | 6  | 80    | 0.0       | 0.5                 | 304.8 $\pm$ 66.6                               | 6.0 $\pm$ 1.7                            | 314.2 $\pm$ 1.0              | 87.8 $\pm$ 0.3               | 87.1 $\pm$ 0.3               | 19.6 $\pm$ 12.4         | 3.0 $\pm$ 0.2                                      | 1.5 $\pm$ 0.1               | 4.39 $\pm$ 0.29       |
|           |        |                                |              |              | 10  | 6  | 10    | 0.5       | 0.7                 | 190.1 $\pm$ 27.2                               | 15.4 $\pm$ 2.1                           | 407.6 $\pm$ 1.2              | 103.7 $\pm$ 0.3              | 102.3 $\pm$ 0.3              | 19.8 $\pm$ 12.6         | 4.9 $\pm$ 0.3                                      | 2.4 $\pm$ 0.1               | 2.02 $\pm$ 0.12       |
|           |        |                                |              |              | 10  | 6  | 10    | 1.0       | 0.7                 | 220.5 $\pm$ 33.7                               | 13.8 $\pm$ 2.3                           | 387.6 $\pm$ 1.1              | 100.1 $\pm$ 0.3              | 98.5 $\pm$ 0.3               | 19.4 $\pm$ 12.3         | 4.5 $\pm$ 0.3                                      | 2.2 $\pm$ 0.1               | 2.48 $\pm$ 0.14       |
|           |        |                                |              |              | All |    |       |           |                     |                                                |                                          |                              |                              |                              | 20.6 $\pm$ 17.4         | 327.3 $\pm$ 24.5                                   | 43.2 $\pm$ 5.7              |                       |
|           |        |                                |              |              |     |    |       |           |                     |                                                |                                          |                              |                              |                              |                         |                                                    |                             |                       |
| N         | 62     | 5.625                          | 60           | 2429         | 5   | 6  | 5     | 0.0       | 0.7                 | 108.6 $\pm$ 20.3                               | 22.7 $\pm$ 2.7                           | 468.3 $\pm$ 2.2              | 123.0 $\pm$ 0.6              | 129.5 $\pm$ 0.6              | 18.9 $\pm$ 12.0         | 7.1 $\pm$ 0.4                                      | 3.6 $\pm$ 0.2               | 0.77 $\pm$ 0.06       |
|           |        |                                |              |              | 10  | 6  | 10    | 0.0       | 0.7                 | 162.5 $\pm$ 43.2                               | 16.4 $\pm$ 3.6                           | 405.2 $\pm$ 2.0              | 103.7 $\pm$ 0.5              | 104.0 $\pm$ 0.5              | 19.6 $\pm$ 12.4         | 5.6 $\pm$ 0.3                                      | 2.8 $\pm$ 0.2               | 2.08 $\pm$ 0.21       |
|           |        |                                |              |              | 15  | 6  | 15    | 0.0       | 0.7                 | 195.7 $\pm$ 57.9                               | 15.3 $\pm$ 4.1                           | 383.5 $\pm$ 1.9              | 98.7 $\pm$ 0.5               | 101.3 $\pm$ 0.5              | 20.1 $\pm$ 12.7         | 5.3 $\pm$ 0.3                                      | 2.6 $\pm$ 0.2               | 3.18 $\pm$ 0.33       |
|           |        |                                |              |              | 20  | 6  | 20    | 0.0       | 0.7                 | 211.9 $\pm$ 65.9                               | 11.6 $\pm$ 3.7                           | 379.9 $\pm$ 1.9              | 99.8 $\pm$ 0.5               | 101.9 $\pm$ 0.5              | 20.4 $\pm$ 12.9         | 5.3 $\pm$ 0.3                                      | 2.6 $\pm$ 0.1               | 4.02 $\pm$ 0.41       |
|           |        |                                |              |              | 10  | 3  | 10    | 0.0       | 1.1                 | 267.5 $\pm$ 44.4                               | 31.9 $\pm$ 4.0                           | 513.4 $\pm$ 2.3              | 134.8 $\pm$ 0.6              | 138.3 $\pm$ 0.6              | 21.6 $\pm$ 13.7         | 8.5 $\pm$ 0.5                                      | 4.2 $\pm$ 0.2               | 3.66 $\pm$ 0.25       |
|           |        |                                |              |              | 10  | 11 | 10    | 0.0       | 0.4                 | 101.9 $\pm$ 33.6                               | 7.0 $\pm$ 1.8                            | 346.9 $\pm$ 1.8              | 87.3 $\pm$ 0.4               | 91.7 $\pm$ 0.5               | 17.5 $\pm$ 11.2         | 4.4 $\pm$ 0.3                                      | 2.2 $\pm$ 0.1               | 1.14 $\pm$ 0.12       |
|           |        |                                |              |              | 10  | 16 | 10    | 0.0       | 0.3                 | 60.5 $\pm$ 25.2                                | 3.6 $\pm$ 1.1                            | 317.1 $\pm$ 1.7              | 81.5 $\pm$ 0.4               | 86.0 $\pm$ 0.5               | 16.0 $\pm$ 10.2         | 3.7 $\pm$ 0.2                                      | 1.9 $\pm$ 0.1               | 0.76 $\pm$ 0.08       |
|           |        |                                |              |              | 10  | 21 | 10    | 0.0       | 0.2                 | 50.4 $\pm$ 22.8                                | 3.3 $\pm$ 1.0                            | 294.7 $\pm$ 1.7              | 78.1 $\pm$ 0.4               | 83.9 $\pm$ 0.5               | 14.1 $\pm$ 9.0          | 3.1 $\pm$ 0.2                                      | 1.6 $\pm$ 0.1               | 0.57 $\pm$ 0.06       |
|           |        |                                |              |              | 10  | 6  | 20    | 0.0       | 0.6                 | 166.7 $\pm$ 59.1                               | 8.9 $\pm$ 3.3                            | 359.1 $\pm$ 1.8              | 93.8 $\pm$ 0.5               | 97.8 $\pm$ 0.5               | 19.2 $\pm$ 12.2         | 4.7 $\pm$ 0.3                                      | 2.4 $\pm$ 0.1               | 3.01 $\pm$ 0.32       |
|           |        |                                |              |              | 10  | 6  | 40    | 0.0       | 0.6                 | 211.5 $\pm$ 79.8                               | 8.3 $\pm$ 2.8                            | 336.1 $\pm$ 1.8              | 88.4 $\pm$ 0.5               | 96.3 $\pm$ 0.5               | 18.8 $\pm$ 11.9         | 4.1 $\pm$ 0.2                                      | 2.1 $\pm$ 0.1               | 3.77 $\pm$ 0.41       |
|           |        |                                |              |              | 10  | 6  | 80    | 0.0       | 0.5                 | 205.9 $\pm$ 98.6                               | 8.0 $\pm$ 3.9                            | 299.1 $\pm$ 1.7              | 82.4 $\pm$ 0.5               | 91.2 $\pm$ 0.5               | 19.3 $\pm$ 12.4         | 3.4 $\pm$ 0.2                                      | 1.7 $\pm$ 0.1               | 4.58 $\pm$ 0.52       |
|           |        |                                |              |              | 10  | 6  | 10    | 0.5       | 0.7                 | 162.5 $\pm$ 43.2                               | 16.4 $\pm$ 3.6                           | 405.2 $\pm$ 2.0              | 103.4 $\pm$ 0.5              | 104.0 $\pm$ 0.5              | 19.4 $\pm$ 12.2         | 5.6 $\pm$ 0.3                                      | 2.8 $\pm$ 0.2               | 2.08 $\pm$ 0.21       |
|           |        |                                |              |              | 10  | 6  | 10    | 1.0       | 0.6                 | 172.6 $\pm$ 53.2                               | 11.9 $\pm$ 3.1                           | 377.9 $\pm$ 1.9              | 96.2 $\pm$ 0.5               | 99.5 $\pm$ 0.5               | 19.3 $\pm$ 12.2         | 5.0 $\pm$ 0.3                                      | 2.5 $\pm$ 0.1               | 2.63 $\pm$ 0.27       |
|           |        |                                |              |              | All |    |       |           |                     |                                                |                                          |                              |                              |                              | 19.8 $\pm$ 16.8         | 340.9 $\pm$ 25.6                                   | 46.4 $\pm$ 6.2              |                       |

**Table S3:** the values of all quantities assessed in this work for all simulations of single-molecule FRET with a mixture of two FRET subpopulations

| PSF <sup>1</sup><br>(G <sup>2</sup> /N <sup>3</sup> ) | Sim<br>time <sup>4</sup><br>(s) | Donor ch.<br>BG rate <sup>5</sup><br>(Hz) | Acceptor ch.<br>BG rate <sup>6</sup> (Hz) | m <sup>7</sup> | F <sup>8</sup> | sz<br>th <sup>9</sup> | All parameters free to change <sup>10</sup> |                                     |                                  |                                     |                                |                         | f=0.6666 fixed <sup>11</sup> |                                |                             |                                |            |
|-------------------------------------------------------|---------------------------------|-------------------------------------------|-------------------------------------------|----------------|----------------|-----------------------|---------------------------------------------|-------------------------------------|----------------------------------|-------------------------------------|--------------------------------|-------------------------|------------------------------|--------------------------------|-----------------------------|--------------------------------|------------|
|                                                       |                                 |                                           |                                           |                |                |                       | $\mu_1^{12}$ (x10 <sup>3</sup> )            | $\sigma_1^{13}$ (x10 <sup>3</sup> ) | $\mu_2^{14}$ (x10 <sup>3</sup> ) | $\sigma_2^{15}$ (x10 <sup>3</sup> ) | $f_1^{16}$ (x10 <sup>3</sup> ) | Amplitude <sup>17</sup> | $\mu_1$ (x10 <sup>3</sup> )  | $\sigma_1$ (x10 <sup>3</sup> ) | $\mu_2$ (x10 <sup>3</sup> ) | $\sigma_2$ (x10 <sup>3</sup> ) | Amplitude  |
| G                                                     | 60                              | 1551                                      | 829                                       | 10             | 6              | 10                    | 729.0±7.5                                   | 84.9±6.0                            | 492.8±13.9                       | 92.8±11.5                           | 634.3±16.2                     | 167±6                   | 722.0±6.7                    | 90.9±6.0                       | 480.8±11.3                  | 82.2±9.7                       | 1587±39    |
|                                                       |                                 |                                           |                                           | 10             | 11             | 10                    | 727.8±6.7                                   | 92.5±6.8                            | 476.9±9.6                        | 74.4±9.0                            | 617.2±18.4                     | 183±8                   | 727.8±6.7                    | 92.5±6.8                       | 476.9±9.6                   | 74.4±9.0                       | 1701±53    |
|                                                       |                                 |                                           |                                           | 10             | 21             | 10                    | 741.8±9.4                                   | 87.6±7.4                            | 491.4±18.1                       | 101.5±15.2                          | 632.9±19.5                     | 170±7                   | 733.0±8.5                    | 96.0±7.7                       | 476.2±14.6                  | 87.3±12.6                      | 1708±51    |
|                                                       |                                 |                                           |                                           |                |                |                       |                                             |                                     |                                  |                                     |                                |                         |                              |                                |                             |                                |            |
| G                                                     | 180                             | 1551                                      | 852                                       | 10             | 6              | 10                    | 730.9±3.9                                   | 83.1±3.2                            | 486.9±8.5                        | 98.1±7.4                            | 658.3±8.9                      | 507±10                  | 725.5±3.7                    | 88.0±3.3                       | 476.2±7.2                   | 87.5±6.5                       | 4856±73    |
|                                                       |                                 |                                           |                                           | 10             | 11             | 10                    | 732.8±5.8                                   | 87.2±5.1                            | 478.4±11.8                       | 92.2±10.7                           | 664.3±13.8                     | 536±17                  | 731.0±5.5                    | 88.9±5.1                       | 475.0±11.0                  | 88.5±10.1                      | 5173±123   |
|                                                       |                                 |                                           |                                           | 10             | 21             | 10                    | 739.9±10.4                                  | 92.2±7.9                            | 487.3±23.2                       | 103.5±18.4                          | 669.2±22.6                     | 495±22                  | 736.8±9.7                    | 94.8±7.9                       | 480.6±20.7                  | 98.0±16.9                      | 5150±152   |
|                                                       |                                 |                                           |                                           |                |                |                       |                                             |                                     |                                  |                                     |                                |                         |                              |                                |                             |                                |            |
| N                                                     | 60                              | 1585                                      | 902                                       | 10             | 6              | 10                    | 719.5±11.9                                  | 93.2±9.4                            | 465.9±22.6                       | 99.0±18.3                           | 644.6±24.3                     | 74±4                    | 714.5±10.8                   | 97.4±9.3                       | 457.3±19.3                  | 91.0±16.1                      | 769.1±26.5 |
|                                                       |                                 |                                           |                                           | 10             | 11             | 10                    | 758.7±18.1                                  | 81.2±14.5                           | 526.3±49.7                       | 134.0±36.2                          | 568.2±77.7                     | 66±8                    | 728.8±19.8                   | 105.0±16.4                     | 465.6±32.0                  | 92.9±24.6                      | 737.8±36.1 |
|                                                       |                                 |                                           |                                           | 10             | 21             | 10                    | 742.1±11.2                                  | 86.1±9.6                            | 476.7±23.5                       | 104.2±21.6                          | 649.4±25.0                     | 65±4                    | 734.6±10.1                   | 93.9±9.8                       | 462.6±18.7                  | 89.1±17.7                      | 647±29     |
|                                                       |                                 |                                           |                                           |                |                |                       |                                             |                                     |                                  |                                     |                                |                         |                              |                                |                             |                                |            |
| N                                                     | 180                             | 1585                                      | 902                                       | 10             | 6              | 10                    | 736.1±13.6                                  | 91.1±8.5                            | 500.8±33.9                       | 118.9±23.0                          | 637.5±43.3                     | 212±13                  | 724.0±11.7                   | 98.8±8.7                       | 475.1±23.5                  | 98.6±17.2                      | 2321±63    |
|                                                       |                                 |                                           |                                           | 10             | 11             | 10                    | 730.5±10.0                                  | 96.8±8.2                            | 480.5±18.8                       | 92.2±14.9                           | 660.0±21.6                     | 218±9                   | 730.9±10.2                   | 96.5±8.2                       | 481.3±19.1                  | 93.0±15.1                      | 2258±64    |
|                                                       |                                 |                                           |                                           | 10             | 21             | 10                    | 735.9±9.3                                   | 96.1±8.2                            | 471.7±19.0                       | 94.4±16.3                           | 672.7±20.6                     | 201±9                   | 737.1±9.6                    | 95.1±8.2                       | 473.9±19.9                  | 96.7±17.0                      | 2088±68    |

<sup>1</sup> – The shape of the point-spread function (PSF) used in the simulation  
<sup>2</sup> – Gaussian-shaped PSF with standard deviations of 180 nm in the x & y directions and 880 nm in the z direction. This PSF is the equivalent of the Numeric PSF used in this work, when comparing the energies of both PSFs  
<sup>3</sup> – Numerically-calculated PSF. It is based on an excitation PSF calculated using the PSF Lab web server that was doubled. The convolution with the pinhole function was not considered as the simulations mimic measurements with overfilling of objective back aperture.  
<sup>4</sup> – The overall time in which 15 simulated molecules were diffusing in a rectangular box.  
<sup>5</sup> – The background (BG) rate in the donor detection channel, as was retrieved by from exponential function fitting to the slow process in the inter-photon time histogram. The simulated background from dark counts was 1500 Hz. The retrieved values were always higher than 2300 Hz, due to molecules diffusing outside the effective detection volume and emitting photons at a rate comparable to the BG rate. As the concentration decreased, so did the value of the retrieved BG rate, relative to the simulated BG rate due to dark counts.  
<sup>6</sup> – The background (BG) rate in the acceptor detection channel, as was retrieved by from exponential function fitting to the slow process in the inter-photon time histogram. The simulated background from dark counts was 800 Hz. The retrieved values were always higher than 2300 Hz, due to molecules diffusing outside the effective detection volume and emitting photons at a rate comparable to the BG rate. As the concentration decreased, so did the value of the retrieved BG rate, relative to the simulated BG rate due to dark counts.  
<sup>7</sup> – The burst search time window of *m* consecutive photons  
<sup>8</sup> – A number setting the threshold on the minimal multiplier of the photon rate, relative to the BG rate, above which, photons are considered part of a burst  
<sup>9</sup> – The minimal amount of photons in a burst (its minimal size)  
<sup>10</sup> – fitting to a sum-of-two-gaussians model, with all free parameters unconstrained  
<sup>11</sup> - fitting to a sum-of-two-gaussians model, with all free parameters unconstrained, except for the fraction of the population with FRET efficiency of 0.75, that was fixed at the simulated value, f=0.6666  
<sup>12</sup> – The best fit value of the mean FRET efficiency of the 1<sup>st</sup> population out of two (the simulated mean FRET efficiency was 0.75). The reported error values are the fitting error values.  
<sup>13</sup> - The best fit value of the FRET efficiency standard deviation of the 1<sup>st</sup> population out of two. The reported error values are the fitting error values.  
<sup>14</sup> – The best fit value of the mean FRET efficiency of the 2<sup>nd</sup> population out of two (the simulated mean FRET efficiency was 0.50). The reported error values are the fitting error values.  
<sup>15</sup> - The best fit value of the FRET efficiency standard deviation of the 2<sup>nd</sup> population out of two. The reported error values are the fitting error values.  
<sup>16</sup> – The best fit value of the fraction of the 1<sup>st</sup> population out of two (the simulated fraction was 0.666). The reported error values are the fitting error values.  
<sup>17</sup> – The best fit value of the amplitude, as the amount of bursts. The reported error values are the fitting error values.

Table S4: the values of all quantities assessed in this work from burst analyses of single-molecule FRET measurements of a mixture of two FRET subpopulations

| Sample name                  | m <sup>1</sup> | f <sup>2</sup> | sz th <sup>3</sup> | Donor ch.<br>BG rate <sup>4</sup> (Hz) | Acceptor ch.<br>BG rate <sup>5</sup> (Hz) | μ <sub>1</sub> <sup>6</sup> (x10 <sup>3</sup> ) | σ <sub>1</sub> <sup>7</sup> (x10 <sup>3</sup> ) | μ <sub>2</sub> <sup>8</sup> (x10 <sup>3</sup> ) | σ <sub>2</sub> <sup>9</sup> (x10 <sup>3</sup> ) |
|------------------------------|----------------|----------------|--------------------|----------------------------------------|-------------------------------------------|-------------------------------------------------|-------------------------------------------------|-------------------------------------------------|-------------------------------------------------|
| (-8)TA-(+4)NTD <sup>10</sup> | 10             | 6              | 10                 | 176.6±1.4                              | 121.7±1.0                                 | 679.9±8.3                                       | 128.1±8.3                                       | - <sup>11</sup>                                 | -                                               |
|                              | 10             | 11             | 10                 |                                        |                                           | 683.3±7.7                                       | 133.8±7.7                                       | -                                               | -                                               |
|                              | 10             | 16             | 10                 |                                        |                                           | 683.7±5.0                                       | 113.1±5.0                                       | -                                               | -                                               |
|                              | 10             | 21             | 10                 |                                        |                                           | 686.1±4.2                                       | 117.3±4.2                                       | -                                               | -                                               |
|                              |                |                |                    |                                        |                                           |                                                 |                                                 |                                                 |                                                 |
| (-15)TA-(+2)NTD              | 10             | 6              | 10                 | 254.7±2.1                              | 151.1±1.1                                 | -                                               | -                                               | 332.9±2.1                                       | 94.7±2.1                                        |
|                              | 10             | 11             | 10                 |                                        |                                           | -                                               | -                                               | 336.6±2.1                                       | 96.6±2.1                                        |
|                              | 10             | 16             | 10                 |                                        |                                           | -                                               | -                                               | 336.1±3.0                                       | 90.1±3.0                                        |
|                              | 10             | 21             | 10                 |                                        |                                           | -                                               | -                                               | 335.1±3.1                                       | 92.9±3.1                                        |
|                              |                |                |                    |                                        |                                           |                                                 |                                                 |                                                 |                                                 |
| Mixture <sup>12</sup>        | 10             | 6              | 10                 | 339.0±6.4                              | 201.3±3.8                                 | 640.3±23.3                                      | 135.6±20.6                                      | 327.6±4.2                                       | 100.8±3.4                                       |
|                              | 10             | 11             | 10                 |                                        |                                           | 648.8±25.8                                      | 142.0±23.2                                      | 330.5±4.7                                       | 99.4±3.8                                        |
|                              | 10             | 16             | 10                 |                                        |                                           | 667.9±19.9                                      | 117.2±19.6                                      | 337.4±4.5                                       | 104.3±4.2                                       |
|                              | 10             | 21             | 10                 |                                        |                                           | 684.4±18.9                                      | 102.7±19.8                                      | 340.7±4.9                                       | 104.0±5.1                                       |

<sup>1</sup> – The burst search time window of  $m$  consecutive photons

<sup>2</sup> – A number setting the threshold on the minimal multiplier of the photon rate, relative to the BG rate, above which, photons are considered part of a burst

<sup>3</sup> – The minimal amount of photons in a burst (its minimal size)

<sup>4</sup> – The mean background (BG) rate in the donor detection channel, as was retrieved by from averaging over exponential function fitting the slow process in the inter-photon time histogram, for each 20 second period of the measurement. Errors were calculated as the standard error of all 20 second BG rates.

<sup>5</sup> The mean background (BG) rate in the acceptor detection channel, as was retrieved by from averaging over exponential function fitting the slow process in the inter-photon time histogram, for each 20 second period of the measurement. Errors were calculated as the standard error of all 20 second BG rates.

<sup>6</sup> – The best fit value of the mean FRET efficiency of the 1<sup>st</sup> population out of two (the simulated mean FRET efficiency was 0.75). The reported error values are the fitting error values.

<sup>7</sup>- The best fit value of the FRET efficiency standard deviation of the 1<sup>st</sup> population out of two. The reported error values are the fitting error values.

<sup>8</sup> – The best fit value of the mean FRET efficiency of the 2<sup>nd</sup> population out of two (the simulated mean FRET efficiency was 0.50). The reported error values are the fitting error values.

<sup>9</sup>- The best fit value of the FRET efficiency standard deviation of the 2<sup>nd</sup> population out of two. The reported error values are the fitting error values.

<sup>10</sup> – The nomenclature of the sample names refers to the positions of dye labeling a dsDNA with a sequence of the lacCONS promoter. (-XJTA)(-Y)JNTD – an acceptor on the base X positions upstream to the transcription start site of the promoter, on the template strand, and a donor on the base Y positions downstream to the transcription start site of the promoter, on the nontemplate strand.

<sup>11</sup> – no values for this population, for fits to a single gaussian model

<sup>12</sup> – measurement of a mixture of both FRET constructs (-8)TA-(-4)NTD & (-15)TA-(+2)NTD
